1 **KCTD19 associates with ZFP541 and HDAC1 and is required**  
2 **for meiotic exit in male mice**

3

4 Seiya Oura<sup>1,2</sup>, Takayuki Koyano<sup>3</sup>, Chisato Kodera<sup>4</sup>, Yuki Horisawa-Takada<sup>4</sup>, Makoto  
5 Matsuyama<sup>3</sup>, Kei-ichiro Ishiguro<sup>4</sup>, and Masahito Ikawa<sup>1,2,5\*</sup>

6

7

8 <sup>1</sup> Research Institute for Microbial Diseases, Osaka University, Osaka, 565-0871, Japan

9 <sup>2</sup> Graduate School of Pharmaceutical Sciences, Osaka University, Osaka, 565-0871, Japan

10 <sup>3</sup> Division of Molecular Genetics, Shigei Medical Research Institute, Okayama, 701-0202,  
11 Japan

12 <sup>4</sup> Department of Chromosome Biology, Institute of Molecular Embryology and Genetics (IMEG),  
13 Kumamoto University, Kumamoto, 860-0811, Japan

14 <sup>5</sup> The Institute of Medical Science, The University of Tokyo, Minato-ku, Tokyo, 108-8639, Japan

15

16 \*Correspondence: [ikawa@biken.osaka-u.ac.jp](mailto:ikawa@biken.osaka-u.ac.jp) (M. I.)

## 17 **Abstract**

18           Meiosis is a cell division process with complex chromosome events where various  
19 molecules must work in tandem. To find meiosis-related genes, we screened evolutionarily  
20 conserved and reproductive tract-enriched genes using the CRISPR/Cas9 system and  
21 identified potassium channel tetramerization domain containing 19 (*Kctd19*) as an essential  
22 factor for meiosis. In prophase I, *Kctd19* deficiency did not affect synapsis or the DNA  
23 damage response, and chiasma structures were also observed in metaphase I  
24 spermatocytes of *Kctd19* KO mice. However, spermatocytes underwent apoptotic elimination  
25 during the metaphase-anaphase transition. We were able to rescue the *Kctd19* KO  
26 phenotype with an epitope-tagged *Kctd19* transgene. Immunoprecipitation-mass  
27 spectrometry identified zinc finger protein 541 (ZFP541) and histone deacetylase 1 (HDAC1)  
28 as binding partners of KCTD19, indicating that KCTD19 is involved in chromatin  
29 modification. Phenotyping of *Zfp541* KO spermatocytes demonstrated XY chromosome  
30 asynapsis and recurrent DNA damage in the late pachytene stage, leading to apoptosis. In  
31 summary, our study reveals that KCTD19 associates with ZFP541 and HDAC1, and that  
32 both KCTD19 and ZFP541 were essential for meiotic exit in male mice.

33

## 34 **Author summary**

35           Meiosis is a fundamental process that consisting of one round of genomic DNA  
36 replication and two rounds of chromosome segregation producing four haploid cells. To  
37 properly distribute their genetic material, cells need to undergo complex chromosome events  
38 such as a physical linkage of homologous chromosomes (termed synapsis) and meiotic  
39 recombination. The molecules involved in these events have not been fully characterized  
40 yet, especially in mammals. Using a CRISPR/Cas9-screening system, we identified the  
41 potassium channel tetramerization domain containing 19 (*Kctd19*) as an essential factor for  
42 meiosis in male mice. Further, we identified zinc finger protein 541 (ZFP541) and histone  
43 deacetylase 1 (HDAC1) as binding partners of KCTD19. By observing meiosis of *Zfp541*  
44 knockout germ cells, we found that *Zfp541* was also essential for meiotic completion. These  
45 results show that the KCTD19/ZFP541 complex plays a critical role and is indispensable for  
46 male meiosis and fertility.

## 47 Introduction

48 Meiosis is a division process consisting of one round of DNA replication and two  
49 rounds of chromosome segregation, producing four haploid gametes. During meiotic  
50 prophase I, proteinaceous structures termed the synaptonemal complex (SC) are assembled  
51 on sister chromatids and form a scaffold along each homologous chromosome. The  
52 homologs begin to pair and synapse, followed by meiotic recombination yielding a physical  
53 tether between homologs (chiasmata). After completing these chromosome events, the cells  
54 transition to the first meiotic division, where homologs are segregated to the opposite poles  
55 followed by the segregation of sister chromatids in the next round of cell division.

56 The molecules involved in these complex chromosome events are not fully  
57 characterized yet, especially in mammals, due to difficulties in culturing and genetically  
58 manipulating spermatogenic cells in vitro. Thus, knockout (KO) of genes with testis-specific  
59 expression and evolutionarily conservation has been a powerful strategy to identify male  
60 meiosis-related genes and their functions (1). We have generated over 300 testis-enriched  
61 gene KO mice with conventional ES cell-mediated and the CRISPR/Cas9-mediated methods  
62 (2-5) and showed about one-third of them are indispensable for male fertility (6-8). During  
63 this phenotypic screening, we identified a potassium channel tetramerization domain  
64 containing 19 (*Kctd19*) as an evolutionarily conserved and testis expressed gene that is  
65 essential for male fertility in mice.

66 KCTD19 is one of 26 member KCTD family of proteins (9, 10) (KCTD1 – 21,  
67 KCTD12B, TNFAIP1, KCNRG, SHKBP1, and BTBD10;  
68 <http://pfam.xfam.org/family/PF02214.22>) which contains an N-terminal cytoplasmic  
69 tetramerisation domain (T1) usually found in voltage-gated potassium channels. The T1  
70 domain is a subgroup of the BTB (Broad-complex, Tramtrack and Bric-à-brac) domain or

71 POZ (poxvirus and zinc finger) domain family, which are often found at the N-terminus of  
72 C2H2-type zinc-finger transcription factors. A variety of biological functions have been  
73 identified for KCTD proteins (10), including ion channel regulation (11, 12), apoptosis (13,  
74 14), interaction with ubiquitin ligase complexes such as cullin 3 (CUL3) (15, 16), and  
75 degradation of various proteins such as histone deacetylases (HDACs) (15, 17). Regarding  
76 KCTD19, Choi *et al.* found that ZFP541 made complex with KCTD19 and HDAC1 in male  
77 germ cells and valproic acid (HDAC inhibitor) treatment caused hyperacetylation and  
78 KCTD19/ZFP541 reduction in round spermatids (18), suggesting that KCTD19/ZFP541 are  
79 involved in chromatin reorganization during the post-meiotic phase (18).

80 In this study, we generated *Kctd19* KO mice using the CRISPR/Cas9 system and  
81 revealed that *Kctd19* deficiency causes azoospermia due to incomplete meiosis.  
82 Immunoprecipitation-mass spectrometry confirmed KCTD19, ZFP541, and HDAC1  
83 interaction. Further, we also analyzed *Zfp541* null spermatocyte and showed that *Zfp541* is  
84 necessary for pachytene exit. Our results suggested that KCTD19/ZFP541 complex  
85 functions in chromatin modification during meiosis.

86

## 87 **Results**

### 88 ***Kctd19* is a testis-enriched and evolutionally conserved gene**

89 To investigate the spatial expression of *Kctd19* in mice, we performed multi-tissue  
90 RT-PCR using cDNA obtained from adult tissues and embryonic ovary, and we found that  
91 *Kctd19* was specifically expressed in testis (Fig. 1A). In mice, the first wave of  
92 spermatogenesis starts soon after birth and completes within the first 35 days of postnatal  
93 development (19). To determine which stage of spermatogenic cells begin to express  
94 *Kctd19*, we also performed RT-PCR using cDNA obtained from postnatal testis as the first  
95 wave of spermatogenesis was progressing. The result shows that *Kctd19* expression starts  
96 around postnatal day (PND) 10 – 12 (Fig. 1B), which corresponds to the spermatocyte stage  
97 when the first wave of spermatogenesis reaches meiotic prophase. The PCR signals  
98 increased until PND 28 (Fig. 1B), at which time spermatid elongation starts.

99 The mouse KCTD19 protein comprises 950 amino-acid residues and has only one  
100 BTB domain based on SMART software (20) (Fig. 1C). Phylogenetic analysis with Clustal  
101 W2.1 (21) showed that KCTD19 was evolutionarily conserved in many mammals, including  
102 cattle, dogs, mice, and humans (Fig. 1D and S1). These results suggest that KCTD19  
103 functions during the meiotic phase of mammalian spermatogenesis.

104

### 105 ***Kctd19* is required for male fertility.**

106 To uncover the function of *Kctd19* *in vivo*, we generated *Kctd19* KO mice using the  
107 CRISPR/Cas9 system. To avoid affecting the proximal genes, *Lrrc36* and *Plekhhg4*, we  
108 designed the excision of the middle exons 3-12 from 16 exons total (Fig. 1E). Two crRNAs  
109 were mixed with tracrRNA and Cas9, and the prepared ribonucleoproteins (RNPs) were  
110 electroporated into murine zygotes. Of the 49 fertilized eggs that were electroporated, 40

111 two-cell embryos were transplanted into the oviducts of three pseudopregnant female mice.  
112 We obtained seven pups with the intended mutation. Subsequent mating and sequencing  
113 resulted in a heterozygous mouse with a 9620 bp deletion, referred to as *Kctd19<sup>del</sup>* that were  
114 genotyped with PCR (Fig. 1F and G). We confirmed *Kctd19* deletion with immunoblotting  
115 (Fig. 1H) with various antibodies raised against KCTD19 protein (see Fig. 1C). The results  
116 showed complete loss of KCTD19 in *Kctd19<sup>del/del</sup>* testis, and the antibodies specifically  
117 recognize KCTD19 (Fig. 1H). We used rabbit polyclonal antibody (pAb) and rat monoclonal  
118 antibody (mAb) #1 for immunoprecipitation, and rat mAb #2 for immunostaining in  
119 subsequent experiments.

120 Knockout (KO) mice obtained by heterozygous intercrosses showed no overt gross  
121 defects in development, behavior, and survival. We caged individual *Kctd19<sup>del/del</sup>* male mice  
122 with wild type (wt) females for two months to analyze their fertility. Although mating plugs  
123 were often observed, *Kctd19<sup>del/del</sup>* males failed to sire any pups (Fig. 1I). We observed  
124 normal numbers of pups from *Kctd19<sup>del/del</sup>* females with *Kctd19<sup>wt/del</sup>* males (7.8±2.2; Fig. 1J),  
125 indicating that *Kctd19* is not required for female fertility. As *Kctd19<sup>wt/del</sup>* male mice are fully  
126 fertile, we used littermate heterozygous males as controls in some experiments.

127 To determine if the BTB domain of KCTD19 is required for protein function, we  
128 removed exon 2 (297 bp) that encodes the BTB domain by designing two crRNAs targeting  
129 intron 1 and 2 (Fig. S2A – S2C). Despite generating an inframe mutation, the deletion of the  
130 BTB domain affected *Kctd19* expression or/and protein stability, and we could not detect any  
131 truncated KCTD19 protein with our antibodies (Fig. S2D and S2E). The exon 2 deleted mice  
132 showed the same phenotype as *Kctd19<sup>del/del</sup>* mice (Fig. S2F and 2C). Therefore, we regarded  
133 this *Kctd19*-ΔBTB line as equivalent to *Kctd19<sup>del/del</sup>* line, in that both lines result in male  
134 infertility, to corroborate that *Kctd19* is essential for male fertility.

135

136 ***Kctd19* del/del spermatocytes failed to complete meiosis.**

137           When we observed testis gross morphology, *Kctd19*<sup>del/del</sup> testis were smaller than  
138 those of *Kctd19*<sup>wt/del</sup> (testis/ body weight:  $4.5 \pm 0.2 \times 10^{-3}$  [*wt/del*],  $1.2 \pm 0.3 \times 10^{-3}$  [*del/del*]; Fig.  
139 2A and 2B), indicating defective spermatogenesis in *Kctd19*<sup>del/del</sup> testis. To define the cause  
140 of testicular atrophy, we performed hematoxylin and periodic acid-Schiff (PAS) staining of  
141 testicular sections. While three germ cell layers were seen in control testis sections, only two  
142 layers of germ cells were observed in *Kctd19*<sup>del/del</sup> testis (Fig. 2C; low magnification). When  
143 we compared testicular cells based on the cycle of the seminiferous epithelium (22) (23), the  
144 nuclear morphology of spermatocytes was comparable between two genotypes up to  
145 seminiferous stage X – XI, corresponding to the diplotene stage (Fig. 2C). In seminiferous  
146 stage XII, spermatocytes proceeded to metaphase-anaphase in *Kctd19*<sup>del/del</sup> testis as well as  
147 in *Kctd19*<sup>wt/del</sup> testis (Fig. 2C). However, the *Kctd19*<sup>del/del</sup> spermatocytes could not complete  
148 meiotic divisions and accumulated in tubules after stage XII (Fig. 2C; stage I – II). These  
149 accumulated spermatocytes underwent apoptosis (Fig. 2D) and did not develop to haploid  
150 spermatids. As a result, no mature spermatozoa were observed in the cauda epididymis  
151 (Fig. 2E). These observations suggested that *Kctd19*<sup>del/del</sup> spermatocytes failed to complete  
152 meiosis, leading to azoospermia.

153

154 **KCTD19 localized to the nuclei of prophase spermatocytes and round spermatids**

155           To determine KCTD19 localization, we performed immunostaining of testicular  
156 sections with a specific antibody against KCTD19 (Rat mAb #2; Fig. 2F). KCTD19 signals  
157 started to appear in the nuclei of spermatocytes in seminiferous stage III – IV (Fig. 2G),  
158 corresponding to early pachytene stage. The signal continuously localized in the nuclei of



159 spermatocytes (Fig. 2G; stage VII – VIII and X – XI). During the metaphase-anaphase  
160 transition in meiosis, KCTD19 signal spread throughout the cell (Fig. 2G; stage XII). The signals  
161 remained in the nuclei of round spermatids after meiotic division and disappeared in elongating  
162 spermatids. The KO phenotype and KCTD19 localization suggested that KCTD19 regulates  
163 meiosis in spermatocyte nuclei.

164

165 ***Kctd19*<sup>del/del</sup> spermatocytes showed defects in metaphase I organization.**

166 Due to an apparent defect in meiosis in *Kctd19*<sup>del/del</sup> male mice, we examined DNA  
167 double-strand breaks (DSBs) and synapsis by immunostaining  $\gamma$ H2AX and synaptonemal  
168 complex protein 3 (SYCP3), respectively.  $\gamma$ H2AX signals appeared in the leptotene/zygotene  
169 stage and disappeared in the pachytene/diplotene stage, except for the XY body (Fig. 3A  
170 and 3B), suggesting that *Kctd19*<sup>del/del</sup> spermatocytes underwent DSB initiation and resolution  
171 as controls. Also, homologous chromosomes in *Kctd19*<sup>del/del</sup> spermatocytes synapsed in  
172 pachytene stage and desynapsed in diplotene stage remaining physically connected at  
173 chiasmata without obvious defects (Fig. 3A and 3B). However, the diplotene population  
174 declined in juvenile *Kctd19*<sup>del/del</sup> males (P20), but not in adult males (Fig. 3C)

175 To uncover the cause of apoptosis in metaphase spermatocytes, we stained spread  
176 chromosomes with Giemsa's staining. We observed a normal number of bivalent  
177 chromosomes with chiasmata (Fig. 3D), consistent with immunostaining of prophase  
178 spermatocytes. Next, we examined spindles in metaphase I spermatocytes by  
179 immunostaining of CENPC and  $\alpha$ -TUBULIN. Although *Kctd19*<sup>del/del</sup> spermatocytes formed  
180 spindles without apparent defects, they showed chromosome misalignment (Fig. 3E and  
181 3FF; WT: 0 %, *del/del*: 33 %). When we stained SYCP3, we observed SYCP3 aggregates  
182 outside chromosomes, known as polycomplexes (24), more frequently in *Kctd19*<sup>del/del</sup> than in

183 WT metaphase spermatocytes (WT: 12 %, *del/del*: 65 %; Fig. 3G and 3H). These result  
184 suggested that KCTD19 is required for metaphase I organization.

185

### 186 **An epitope-tagged transgene rescues the phenotype of *Kctd19*<sup>del/del</sup> mice**

187 To exclude the possibility that the observed phenotype in *Kctd19*<sup>del/del</sup> males was  
188 caused by an off-target effect from CRISPR/Cas9 cleavage or an aberrant genetic  
189 modification near the *Kctd19* locus, we carried out a rescue experiment by generating  
190 transgenic (Tg) mouse lines. We mixed and injected two DNA constructs having 3xFLAG-  
191 tagged *Kctd19* and 3xHA-tagged *Kctd19* under the testis-specific *Clgn* promoter (25) (Fig  
192 4A) and established two Tg lines: one expressing only 3xHA-tagged *Kctd19* (Tg line #1) and  
193 one expressing both 3xFLAG- and 3xHA-tagged *Kctd19* (Tg line #2; Fig 4B - D). When we  
194 performed immunoprecipitation (IP) with Tg line #2, anti-FLAG antibody-conjugated beads  
195 pull down 3xHA-KCTD19, and vice versa (Fig. 4E and F), suggesting that KCTD19 is a  
196 homomeric protein as previously reported (9, 26).

197 When we mated Tg positive *Kctd19*<sup>del/del</sup> male mice with superovulated WT female  
198 mice (Fig. 4G), we could obtain 2-cell embryos from both Tg lines, #1 (Fig. 4H). In  
199 *Kctd19*<sup>del/del</sup> mice carrying the 3xHA-KCTD19 transgene (#1), the testicular size (testis/body  
200 weight:  $4.7 \pm 1.6$ ; Fig. 4J and 4K) was comparable to WT, and spermatogenesis evaluated  
201 by HePAS staining looked normal. Further, with an anti-HA antibody, we observed a similar  
202 immunostaining pattern with rat monoclonal anti-KCT19 (Fig. 2G), indicating that the 3xHA-  
203 tag did not affect KCTD19 behavior and corroborated the immunostaining results with the  
204 anti-KCTD19 antibody.

205

206 **KCTD19 associates with ZFP541 and HDAC1.**

207 To elucidate KCTD19 function, we identified interacting proteins by  
208 immunoprecipitation (IP) and mass spectrometry (MS). We lysed *Kctd19<sup>del/del</sup>* and juvenile  
209 (PND21) WT testis with non-ionic detergent (NP40) and incubated the lysate with antibodies  
210 (rabbit pAb and rat mAb #1) and protein G-conjugate beads. The specific co-IPed proteins  
211 were visualized by SDS-PAGE and silver staining (Fig. 5A and B). When eluted samples  
212 were subjected to MS analysis, HDAC1 (histone deacetylase 1) and ZNF541 (Zinc finger  
213 protein 54; ZFP541) were reproducibly detected with both antibodies (Fig. 5C), consistent  
214 with a prior study (18). KCTD19 and HDAC1 association was confirmed by reciprocal IP with  
215 an anti-HDAC1 antibody (Fig. 5D).

216 HDAC1 is a modulator of chromatin structure and disruption of HDAC1 results in embryonic  
217 lethality before E10.5 (27) In previous reports, KCTDs were implicated in HDAC degradation  
218 (15, 17). We examine the behavior of HDAC1 in *Kctd19<sup>del/del</sup>* testis by immunoblotting  
219 analysis and immunostaining with the anti-HDAC1 antibody. HDAC1 protein levels and  
220 localization were comparable between *Kctd19<sup>del/del</sup>* and WT testis (Fig. 5E and 5F). The  
221 HDAC1 staining intensity was the strongest in spermatocytes in stage X – XI and lost in  
222 elongating spermatids (Fig. 5F), reminiscent of the KCTD19 staining pattern (Fig. 2G).  
223 These results indicated that KCTD19 works together with HDAC1 in regulating meiotic exit.

224

### 225 ***Zfp541* deficient spermatocytes fail to exit the pachytene stage.**

226 The second factor identified by co-IP MS analysis, *Zfp541*, is evolutionally  
227 conserved (Fig. S3) and specifically expressed in testis (Fig. 6A). Further, the expression  
228 begins around PND10 – 12 and was then continuously detected with increasing signal  
229 intensity at PND 28 (Fig. 6B), reminiscent of *Kctd19* rtPCR (Fig. 1B). The mouse ZFP541  
230 protein comprises 1363 amino-acid residues and has five C2H2 type zinc finger motifs, one

231 ELM2 domain, and one SANT domain based on SMART software (20), indicating  
232 KCTD19/ZFP541 binds DNA. To reveal the function of ZFP541 and its relationship with  
233 KCTD19, we analyzed *Zfp541* KO phenotype with chimeric mice (chimeric analysis) (4) (5).

234 To disrupt gene function completely and minimize an effect on a juxtapose gene,  
235 *Napa*, we designed two sgRNAs targeting the sequence upstream of the start codon and  
236 intron 8 (Fig 6C), and transfected embryonic stem (ES) cells expressing EGFP (28) with two  
237 pairs of sgRNA/Cas9 expressing plasmids (pair 1: gRNA 1 and 3; pair 2: gRNA 2 and 4; Fig  
238 6C). We Screened 32 clones for each pair, and obtained 13 and 11 mutant clones with  
239 biallelic deletion for pair 1 and 2. Accounting for ES cell quality and off-target cleavages, we  
240 produced chimeric mice with one ES cell clone from pair 1 (1 – 3 #2) and pair 2 (2 – 4 #3)  
241 (Fig 6D and E).

242 First, we examined spermatogenesis with HePAS staining of testicular sections.  
243 Almost no round spermatids with GFP were observed in chimeric mice (Fig 6F), as seen in  
244 *Kctd19<sup>del/del</sup>* testis sections. *Zfp541* deficient spermatocytes were eliminated by apoptosis in  
245 stage X – XII seminiferous tubules without reaching metaphase (Fig 6G). Next, we  
246 performed immunostaining with the antibodies against KCTD19. The KCTD19 intensity  
247 became weaker, although not lost, in the nuclei of *Zfp541* deficient spermatocytes than that  
248 of adjacent WT spermatocytes (Fig 6H). On the other hand, the immunofluorescence  
249 intensity of HDAC1 was comparable between *Zfp541* deficient and WT spermatocytes (Fig  
250 6I). Finally, we examined the DNA damage response and synapsis in a XX/XY (Host/ES)  
251 chimeric male mouse (29), in which all spermatocytes are derived from the mutant ES cells  
252 (Fig. S4A and S4B). *Zfp541* deficient spermatocytes initiated DSBs in the leptotene/zygotene  
253 stage and resolved the breaks in the early pachytene stage (Fig. 6J). However, late  
254 pachytene spermatocytes showed recurrent DSBs. Further, when we meticulously examined

255 early pachytene spermatocytes, we could observe asynapsis of XY chromosomes (red and  
256 yellow boxes in Fig. 4J). No diplotene spermatocytes were observed in the chimeric mouse,  
257 consistent with histological analysis. Collectively, these results showed that *Zfp541* deficient  
258 spermatocytes did not reach the diplotene stage. Thus, KCTD19 may function downstream  
259 of ZFP541.  
260

## 261 Discussion

262 In the present study, we identified *Kctd19* as a male fertility-related factor by  
263 CRISPR/Cas9-mediated screening of testis enriched genes and validated our result with  
264 transgenic rescue experiments. Recently, Fang *et al.* also reported metaphase I arrest in  
265 *Kctd19* KO male mice (30), corroborating our results. In detailed phenotypic analyses, we  
266 found that *Kctd19* KO spermatocytes failed to complete meiotic division with defects in  
267 metaphase I organization. Further, we revealed that KCTD19 associates with ZFP541 and  
268 HDAC1 by co-IP experiment using two antibodies against KCTD19. Finally, we produced  
269 chimeric mice with *Zfp541*-KO ES cells and showed that *Zfp541* is essential for pachytene  
270 exit.

271 *Kctd19* KO spermatocytes showed a metaphase-anaphase arrest and were  
272 eliminated by apoptosis. One of the most frequent causes of metaphase I arrest is crossover  
273 (CO) defect causing precocious homolog segregation (31, 32). However, *Kctd19* KO  
274 spermatocytes had a normal number of bivalents (20 homologs) in metaphase I, indicating  
275 that homologs were physically connected in *Kctd19* KO spermatocytes. We also observed  
276 SYCP3 polycomplexes (24), alternative SC structures, in metaphase I spermatocytes. A  
277 common cause of synaptonemal polycomplex formation is an excess amount of free SC  
278 components (24), which might be caused by premature dissociation of SC or misregulation  
279 of SC-related protein expression. However, we could not rule out the possibility that these  
280 metaphase I structural defects might be a secondary effect or phenomena in dying cells. In  
281 addition, we observed a delay of metaphase entry or elimination during prophase I in  
282 juvenile *Kctd19* KO males (PND20), indicating that KCTD19 may function also during  
283 prophase or that the first wave of spermatogenesis is exceptional.

284 To clarify the molecular function of KCTD19, we tried to identify interacting proteins  
285 by IP-MS analysis and found ZFP541 and HDAC1 as candidate proteins, consistent with the  
286 previous report (18). Although some KCTD members have been reported to be associated  
287 with HDAC degradation, we could not observe HDAC1 reduction in KCTD19 KO testis by  
288 immunoblotting or immunostaining analysis. On the other hand, the KCTD19/ZFP541  
289 complex is reminiscent of BTB-ZF proteins, which have another subset of the BTB domain  
290 and the Krüppel-type C2H2 zinc fingers (33). Many BTB-ZF proteins have been implicated in  
291 transcriptional repressors such as N-CoR, SMRT, and HDACs via the BTB domain (34, 35)  
292 (36). The ELM2-SANT domain included in ZFP541 has also been shown to interact with  
293 HDAC1 (18, 37-39). Combined with these previous reports, our results suggested that the  
294 KCTD19/ZFP541 complex works on chromatin modification of spermatocytes with HDAC1.  
295 We also detected CUL9 and DNNTIP1 in the IP-MS analysis with rabbit-generated anti-  
296 KCTD19 antibody, albeit not with the rat antibody. These factors can be excellent targets in  
297 future research because knockdown experiments from other groups showed that CUL9  
298 protects mouse eggs from aneuploidy (40) and DNNTIP1 loss causes chromosome  
299 misalignment in mitosis (41).

300 Finally, the chimeric analysis showed that *Zfp541* KO spermatocytes failed to exit  
301 the pachytene stage, unlike *Kctd19* KO spermatocytes underwent apoptosis during the  
302 metaphase-anaphase transition. *Zfp541* KO spermatocytes failed XY chromosome synapsis,  
303 and  $\gamma$ H2AX foci signals regained outside the XY body in the late pachytene stage, resulting  
304 in apoptosis. Again, we acknowledge that these pachytene structural defects might be  
305 secondary effects or phenomena in dying cells.

306 In summary, our results showed that KCTD19 associates with ZFP541 and HDAC1  
307 and are essential for meiotic exit. Further comparable studies will unveil the exact functions

308 of KCTD19 and ZFP541, which will give some insight into the molecular mechanism in male  
309 meiosis.

310

## 311 **Materials and methods**

### 312 ***Animals***

313 All animal experiments were approved by the Animal Care and Use Committee of  
314 the Research Institute for Microbial Diseases, Osaka University (#Biken-AP-H30-01).  
315 Animals were housed in a temperature-controlled environment with 12 h light cycles and free  
316 access to food and water. B6D2F1 (C57BL/6 × DBA2; Japan SLC, Shizuoka, Japan) mice  
317 and ICR (SLC) were used as embryo donors; B6D2F1 were used for mating and wild-type  
318 control; C57BL6/N (SLC) mice were used to collect RNA for RT-PCR and cloning. Gene-  
319 manipulated mouse lines used in this study will be deposited at both the Riken BioResource  
320 Center (Riken BRC, Tsukuba, Japan) and the Center for Animal Resources and  
321 Development, Kumamoto University (CARD, Kumamoto, Japan). All lines are available  
322 through these centers.

323

### 324 ***Egg collection***

325 To prepare eggs for knockout mouse production, female mice were superovulated by  
326 injection of CARD HyperOva (0.1 mL, Kyudo, Saga, Japan) into the abdominal cavity of  
327 B6D2F1 females, followed by injection of human chorionic gonadotropin (hCG) (7.5 units,  
328 ASKA Pharmaceutical, Tokyo, Japan). Natural mating was done with B6D2F1 males 46~48 h  
329 after CARD HyperOva injection. After 19-21 h, cumulus-intact eggs were collected and  
330 treated with 0.33 mg/mL hyaluronidase (Wako, Osaka, Japan) for 5 min to remove cumulus



331 cells for genome editing. Obtained eggs were cultured in KSOM medium at 37°C under 5%  
332 CO<sub>2</sub> until subsequent treatments.

333

### 334 **Generation of *Kctd19* deletion and *Kctd19-ΔPOZ/TAZ* mice**

335 *Kctd19* deletion mice and *Kctd19-ΔPOZ/TAZ* mice were generated by electroporation  
336 described previously (42, 43). Briefly, a gRNA solution was prepared by annealing two  
337 tracrRNAs (Sigma-Aldrich, St. Louis, MO, USA) and crRNA (Sigma-Aldrich). The target  
338 genomic sequences are listed in Table S1. Then, the gRNA solution and Cas9 nuclease  
339 solution (Thermo Fisher Scientific, Waltham, MA, USA) were mixed. The final concentrations  
340 of gRNA and Cas9 were as follows: for pronuclear injection, 20 ng/μL gRNA, and 100 ng/μL  
341 Cas9 nucleases. The obtained complex was electroporated into fertilized eggs using a  
342 NEPA21 electroporator (NEPA GENE, Chiba, Japan). The electroporated eggs were  
343 transplanted into the oviduct ampulla of pseudopregnant mice (ICR; 10 embryos per ampulla)  
344 on the following day. After 19 days, pups were delivered through Caesarean section and  
345 placed with foster mothers (ICR). To generate heterozygous mutant mice, F0 mice were mated  
346 with WT B6D2F1. Mouse colonies with a 9612 bp deletion and a 2172 bp deletion were  
347 maintained by sibling mating and used for the phenotype analysis of *Kctd19* deletion and  
348 *Kctd19-ΔPOZ*, respectively. The genotyping primers (GeneDesign, Osaka, Japan) and  
349 amplification conditions are available in Table S1.

350

### 351 **Generation of 3xFLAG-*Kctd19* and *Kctd19*-3xHA transgenic mice**

352 The mouse *Kctd19* cDNA (ENSMUST00000167294.7) was tagged 3xFLAG or 3xHA  
353 tag with a rabbit polyA signal inserted under the control of the mouse C<sub>lgn</sub> promoter. After  
354 linearization, an equal amount of the DNA constructs (2.16 ng/μL; 0.54 ng/μL/kbp) were mixed

355 and injected into the pronucleus of fertilized eggs. The injected eggs were transplanted into  
356 the oviduct ampulla of pseudopregnant mice (ICR; 10 embryos per ampulla) the following day.  
357 After 19 days, pups were delivered through Caesarean section and placed with foster mothers  
358 (ICR). Offspring carrying both the 3xFLAG tag-*Kctd19* and *Kctd19*-3xHA transgenes and mice  
359 carrying only 3xHA tag-*Kctd19* transgene were used in this study. The genotyping primers  
360 (GeneDesign) are available in Table S1.

361

### 362 **Generation of *Zfp541* KO ES cells and chimeric mice.**

363 *Zfp541* KO embryonic stem (ES) cells were generated using methods previously  
364 described (5). Briefly, EGR-G01 ES cells were transfected with two pX459 plasmids  
365 (Addgene plasmid #62988) with the target sequences (Table S1), and colonies were  
366 selected after transient puromycin selection. ES cells with normal karyotypes were injected  
367 into ICR embryos and chimeric blastocysts were transferred into the uteri of pseudopregnant  
368 females to produce chimeric offspring. Chimeric males with high ES cell contribution were  
369 used for experiments.

370

### 371 **Cell Lines**

372 EGR-G01 ES cells were generated in the Ikawa Lab (28) and cultured in KnockOut  
373 DMEM (108297-018, Thermo Fisher Scientific) supplemented with 1% Penicillin-  
374 Streptomycin- Glutamine, 55  $\mu$ M 2-mercaptoethanol, 1% Non-Essential Amino Acid Solution  
375 (11140-050, Thermo Fisher Scientific), 1% Sodium Pyruvate (11360-070, Thermo Fisher  
376 Scientific), 30  $\mu$ M Adenosine (A4036, Sigma- Aldrich, St. Louis, MO, USA), 30  $\mu$ M  
377 Guanosine (G6264, Sigma-Aldrich), 30  $\mu$ M Cytidine (C4654, Sigma-Aldrich), 30  $\mu$ M Uridine

378 (U3003, Sigma-Aldrich), 10  $\mu$ M Thymidine (T1895, Sigma-Aldrich), 100 U/ml mouse LIF, and  
379 20% FCS (51650-500, Biowest, Nuaille, France).

380

### 381 ***Bacterial strains***

382 *Escherichia coli* (*E. coli*) strain DH5 $\alpha$  (Toyobo, Osaka, Japan) and BL21(de3) pLysS  
383 (C606003, ThermoFisher Scientific) were used for DNA cloning and protein expression,  
384 respectively. *E. coli* cells were grown in LB or 2 $\times$ YT medium containing 100 mg/L ampicillin  
385 and were transformed or cloned using standard methods.

386

### 387 ***Production of antibodies against KCTD19***

388 A polyclonal antibody against mouse KCTD19 was generated by immunizing rabbits  
389 with the synthetic peptide KRAITLKDWGKQRPKDRES corresponding to amino acids 747-  
390 765 of mouse KCTD19 (NP\_808459.1). For monoclonal antibody production, the DNA  
391 encoding mouse KCTD19 (residue 654-793 aa, NP\_808459.1) was inserted into pGEX6p-1  
392 (GE healthcare), and the expression vector was transformed into *E. coli* strain BL21 (de3)  
393 pLysS (C606003, Thermo Fisher Scientific). GST-KCTD19 was purified using Glutathione  
394 Sepharose 4B (GE Healthcare). The purified KCTD19 protein with a complete adjuvant was  
395 injected into female rats. After 17 days of injection, lymphocytes were collected from iliac  
396 lymph nodes and hybridomas were generated (44, 45). The cell clones were screened by  
397 limited dilution.

398

### 399 ***Sequence comparison analysis***

400 Amino acid sequences of KCTD19 and ZFP541 were obtained from the NCBI Entrez  
401 Protein database. Clustal W2.1 was used for multiple sequence alignment (21).

402

### 403 ***RT-PCR***

404 Using TRIzol reagent (15596-018, ThermoFisher Scientific), total RNA was isolated  
405 from multiple adult tissues of C57BL6/N mice, testes ranging from 1 to 35-day-old mice, and  
406 embryonic ovaries of PND 11.5-19.5. cDNAs were prepared using SuperScript IV Reverse  
407 Transcriptase (180-90050, ThermoFisher Scientific) following the manufacturer's instructions.  
408 Polymerase chain reaction (PCR) was performed using KOD Fx neo (KFX-201, TOYOBO,  
409 Osaka, Japan). The primers (GeneDesign) and amplification conditions for each gene are  
410 summarized in Table S1.

411

### 412 ***Genotype analysis***

413 PCR was performed using KOD FX neo (KFX-201, TOYOBO). The primers  
414 (GeneDesign) and amplification conditions for each gene are summarized in Table S1. PCR  
415 products were purified using a Wizard SV Gel and PCR Clean-Up System (Promega, Madison,  
416 WI, USA) kit, and Sanger sequenced was done using sequence primers listed in Table S1.

417

### 418 ***Fertility analysis of KO mice***

419 To examine fertility, sexually mature male mice were housed with wild-type females  
420 (B6DF1) for at least three months. Both plug and pup numbers were recorded at approximately  
421 10 AM to determine the number of copulations and litter size.

422

### 423 ***Immunoblotting***

424 Proteins from testis were extracted using NP40 lysis buffer [50mM Tris-HCl (pH 7.5),  
425 150 mM NaCl, 0.5% NP-40, 10% Glycerol]. Proteins were separated by SDS-PAGE under

426 reducing conditions and transferred to polyvinylidene fluoride (PVDF) membrane using the  
427 Trans Blot Turbo system (BioRad, Munich, Germany). After blocking with 10% skim milk  
428 (232100, Becton Dickinson, Cockeysville, MD, USA), the membrane was incubated with  
429 primary antibody overnight at 4°C, and then incubated with HRP-conjugated secondary  
430 antibody for 1 h at room temperature. Chemiluminescence was detected by ECL Prime  
431 Western Blotting Detection Reagents (RPN2232, GE Healthcare, Chicago, IL, USA) using the  
432 Image Quant LAS 4000 mini (GE Healthcare). The antibodies used in this study are listed in  
433 Table S2.

434

#### 435 **Morphological and histological analysis of testis**

436 To observe testis gross morphology and measure testicular weight, 11-12 week-old  
437 male mice were euthanized after measuring their body weight. The whole testis was observed  
438 using BX50 and SZX7 (Olympus, Tokyo, Japan) microscopes. For histological analysis, testes  
439 were fixed with Bouin's fixative (16045-1, Polysciences, Warrington, PA, USA) at 4°C O/N,  
440 dehydrated in increasing ethanol concentrations and 100% xylene, embedded in paraffin, and  
441 sectioned (5 µm). The paraffin sections were hydrated with Xylene and decreasing ethanol  
442 concentrations and treated with 1% periodic acid (26605-32, Nacalai Tesque, Kyoto, Japan)  
443 for 10 min, treated with Schiff's reagent (193-08445, Wako) for 20 min, counterstained with  
444 Mayer's hematoxylin solution (131-09665, Wako) for 3 min, dehydrated in increasing ethanol  
445 concentrations, and finally mounted with Permount (SP15-100-1, Ferma, Tokyo, Japan). The  
446 sections were observed using a BX53 (Olympus) microscope.

447

#### 448 ***Apoptosis detection in testicular section***

449 TdT-mediated dUTP nick end labeling (TUNEL) staining was carried out with In Situ

450 Apoptosis Detection Kit (MK500, Takara Bio Inc., Shiga, Japan), according to the  
451 manufacturer's instruction. Briefly, testes were fixed with Bouin's fixative, embedded in paraffin,  
452 and sectioned (5  $\mu$ m). After paraffin removal, the slides were boiled in citrate buffer (pH 6.0;  
453 1:100; ab93678, abcam, Cambridge, UK) for 10 min and incubated in 3% H<sub>2</sub>O<sub>2</sub> at room  
454 temperature for 5 min for endogenous peroxidase inactivation, followed by a labeling reaction  
455 with TdT enzyme and FITC-conjugated dUTP at 37°C for 1 h.

456 For chromogenic detection of apoptosis, the sections were incubated with HRP-  
457 conjugated anti-FITC antibody at 37°C for 30 min. The section was then incubated in  
458 ImmPACT DAB (SK-4105, Vector Laboratories, Burlingame, CA, USA) working solution,  
459 counterstained with Mayer's hematoxylin solution for 3 min, dehydrated in increasing ethanol  
460 concentrations, and finally mounted with Permount. The sections were observed using a BX53  
461 (Olympus) microscope.

462

### 463 ***Immunostaining of testes***

464 Testes were fixed in 4% paraformaldehyde (PFA) overnight at 4 °C, followed by  
465 dehydration in increasing ethanol concentrations and 100% of xylene, embedded in paraffin,  
466 and sectioned (5  $\mu$ m). After paraffin removal, the slides were boiled in pH 6.0 citrate buffer for  
467 10 min, blocked and permeabilized in 10% goat serum and 0.1% TritonX-100 for 20 min in  
468 PBS, and incubated with primary antibody overnight at 4°C or 1 h at room temperature in  
469 blocking solution; 1 h incubation was performed when using rat monoclonal anti-KCTD19  
470 antibody. After incubation with AlexaFlour488/546-conjugated secondary antibody (1:200) at  
471 room temperature for 1 h, samples are counterstained with Hoechst 33342 (1:2000; H3570,  
472 Thermo Fisher Scientific) and mounted with Immu-Mount (9990402, Thermo Fisher Scientific).  
473 The antibodies used in this study are listed in Table S2.

474 Seminiferous tubule stages were identified based on the morphological  
475 characteristics of the germ cell nuclei and acrosome staining with AlexaFlour488/568-  
476 conjugated lectin PNA (L21409/L32458, Thermo Fisher Scientific). The sections were  
477 observed using a BX53 (Olympus) microscope and a Nikon Eclipse Ti microscope connected  
478 to a Nikon C2 confocal module (Nikon, Tokyo, Japan). Fluorescent images were false-colored  
479 and cropped using ImageJ software.

480

### 481 ***Immunostaining of surface chromosome spread***

482 Spread nuclei from spermatocytes were prepared as described (46) with slight  
483 modification. In brief, seminiferous tubules were unraveled using forceps in ice-cold DMEM  
484 (11995065, Thermo Fisher Scientific) and incubated in 1 mg/mL collagenase (C5138, Sigma-  
485 Aldrich) in DMEM (20 mL) at 37°C for 15 min. After 3 washes with DMEM, the tubules were  
486 transferred to 20 mL trypsin/DNaseI medium [0.025 w/v% trypsin, 0.01 w/v% EDTA, 10U DNase  
487 in DMEM] and incubated at 37 °C for 10 min. After adding 5 mL of heat-inactivated FCS and  
488 pipetting, the solution was filtered through 59 µm mesh (N-N0270T, NBC Meshtec inc., Tokyo,  
489 Japan) to remove tubule debris. The collected testicular cells were resuspended in hypotonic  
490 solution [100 mM sucrose] and 10µL of the suspension was dropped onto a slide glass with  
491 100 µL of fixative solution [100 µL of 1% PFA, 0.1% (v/v) Triton X-100]. The slides were then  
492 air-dried and washed with PBS containing 0.4% Photo-Flo 200 (1464510, Kodak Alaris, NY,  
493 USA) or frozen for longer storage at -80°C.

494 The spread samples were blocked with 10% goat serum in PBS and then incubated  
495 with primary antibodies overnight at 4°C in blocking solution. After incubation with AlexaFlour  
496 488/546-conjugated secondary antibody (1:200) at room temperature for 1 h, samples are  
497 counterstained with Hoechst 33342 and mounted with Immu-Mount. The samples were

498 observed using a BX53 (Olympus) microscope.

499

#### 500 ***Giemsa staining of metaphase I chromosome spread***

501 For preparing metaphase chromosome spreads, seminiferous tubules were  
502 unraveled using forceps in ice-cold PBS and transferred to a 1.5-mL tube with 1 mL of  
503 accutase (12679-54, Nacalai Tesque), followed by clipping the tubules, and a 5 min incubation  
504 at room temperature. After filtration with a 59 µm mesh and centrifugation, the cells were  
505 resuspended in 8 mL of hypotonic solution [1% sodium citrate] and incubated for 5 min at room  
506 temperature. The suspension was centrifuged and 7 mL of supernatant was aspirated. The  
507 cells were then resuspended in the remaining 1 mL of supernatant and 7 mL of Carnoy's  
508 Fixative (75 % Methanol, 25% Acetic Acid) were added gradually while shaking. After 2  
509 washes with Carnoy's Fixative, the cells were resuspended ~ 0.5 mL of Carnoy's Fixative and  
510 dropped onto a wet glass slide. The slide was stained with Giemsa Stain Solution (079-04391,  
511 wako) and observed using a BX53 (Olympus) microscope.

512

#### 513 ***Immunostaining of metaphase I cells***

514 For cytological analysis of metaphase I cells, seminiferous tubule squashes were  
515 performed as previously described (47). In brief, seminiferous tubules were incubated in  
516 fix/lysis solution [0.1 % TritonX-100, 0.8 % PFA in PBS] at room temperature for 5 min. Tubule  
517 bunches were then put on glass slides with 100 µL of fix/lysis solution, minced into 1.0 ~ 3.0  
518 mm segments with forceps, and arranged so that no tubule segment overlapped. After removing  
519 the excess amount of fix/lysis solution, a coverslip and pressure was applied to disperse cells,  
520 followed by flash freezing in liquid nitrogen for 15 sec, and removing the coverslip with forceps  
521 and a needle. For longer storage, the slide glasses were kept at -80 °C with the coverslip.



522 The slides were blocked and permeabilized in 10% goat serum and 0.1% Triton X-  
523 100 for 20 min in PBS, and incubated with primary antibody overnight at 4°C. After incubation  
524 with AlexaFlour 488/546-conjugated secondary antibody (1:200) at room temperature for 1 h,  
525 samples are counterstained with Hoechst 33342 (1:2000) and mounted with Immu-Mount. Z-  
526 stack images were taken using a BZ-X700 (kyence, Osaka, Japan) microscope and stacked  
527 using ImageJ software. The antibodies used in this study are listed in Table S2.

528

### 529 ***Immunoprecipitation and mass spectrometry analysis***

530 Proteins from testis were extracted using NP40 lysis buffer [50 mM Tris-HCl (pH7.5),  
531 150 mM NaCl, 0.5% NP-40, 10% Glycerol]. Protein lysates were mixed with Dynabeads  
532 Protein G (Thermo)-conjugated with 2.0 µg of antibody. The immune complexes were  
533 incubated for 1 h at 4°C and washed 3 times with NP40 lysis buffer. Co-immunoprecipitated  
534 products were then eluted with 18 µL of 100 mM Gly-HCl (pH2.5) and neutralized with 2µL of  
535 1 M Tris. The antibodies used in this study are listed in Table S2. Half of the eluted amount  
536 was subjected to SDS-PAGE and silver staining (06865-81, Nacalai Tesque). The remaining  
537 half amount was subjected to mass spectrometry (MS) analysis.

538 The proteins were reduced with 10 mM dithiothreitol (DTT), followed by alkylation with  
539 55 mM iodoacetamide, and digested by treatment with trypsin and purified with a C18 tip (GL-  
540 Science, Tokyo, Japan). The resultant peptides were subjected to nanocapillary reversed-  
541 phase LC-MS/MS analysis using a C18 column (25 cm × 75 µm, 1.6 µm; IonOpticks, Victoria,  
542 Australia) on a nanoLC system (Bruker Daltoniks, Bremen, Germany) connected to a tims  
543 TOF Pro mass spectrometer (Bruker Daltoniks) and a modified nano-electrospray ion source  
544 (CaptiveSpray; Bruker Daltoniks). The mobile phase consisted of water containing 0.1% formic  
545 acid (solvent A) and acetonitrile containing 0.1% formic acid (solvent B). Linear gradient elution

546 was carried out from 2% to 35% solvent B for 18 min at a flow rate of 400 nL/min. The ion  
547 spray voltage was set at 1.6 kV in the positive ion mode. Ions were collected in the trapped  
548 ion mobility spectrometry (TIMS) device over 100 ms and MS and MS/MS data were acquired  
549 over an  $m/z$  range of 100-1,700. During the collection of MS/MS data, the TIMS cycle was  
550 adjusted to 1.1 s and included 1 MS plus 10 parallel accumulation serial fragmentation  
551 (PASEF)-MS/MS scans, each containing on average 12 MS/MS spectra (>100 Hz), and  
552 nitrogen gas was used as the collision gas.

553 The resulting data were processed using DataAnalysis version 5.1 (Bruker Daltoniks),  
554 and proteins were identified using MASCOT version 2.6.2 (Matrix Science, London, UK)  
555 against the SwissProt database. Quantitative value and fold exchange were calculated by  
556 Scaffold4 (Proteome Software, Portland, OR, USA) for MS/MS-based proteomic studies.

557

### 558 ***Chimeric analysis***

559 For distinguishing ESC-derived germ cells, GFP was stained by immunofluorescence  
560 or immunohistochemistry. The antibodies used in this study are listed in Table S2.

561

### 562 ***Author contributions***

563 S.O. and M.I. conceived and designed the research; S.O. performed experiments;  
564 S.O., T.K, C.K, Y.T., and K.I prepared materials; S.O. analyzed data; S.O. and M.I. wrote the  
565 paper.

566

### 567 ***Declaration of interests***

568 The authors declare no competing interests.

569

570 **Data availability statement**

571           The authors declare that the data that support the findings of this study are  
572 available from the corresponding author upon request.

573

## 574 **Acknowledgement**

575           We would like to thank Eri Hosoyamada and Mei Koyama for their technical  
576 assistance and Dr. Julio M. Castaneda for the critical reading of the manuscript. This work was  
577 supported by the Ministry of Education, Culture, Sports, Science and Technology  
578 (MEXT)/Japan Society for the Promotion of Science (JSPS) KAKENHI grants (JP19J21619 to  
579 S.O., JP19H05743 to K.I., and JP19H05750 to M.I.); Japan Agency for Medical Research and  
580 Development (AMED) grant JP18gm5010001 to M.I.; Takeda Science Foundation grants to  
581 M.I. The funders had no role in the study design, data collection and analysis, decision to  
582 publish, or preparation of the manuscript.

583

## 584 **References**

- 585 1. Matzuk MM, Lamb DJ. The biology of infertility: research advances and clinical  
586 challenges. *Nat Med.* 2008;14(11):1197-213.
- 587 2. Mashiko D, Fujihara Y, Satouh Y, Miyata H, Isotani A, Ikawa M. Generation of mutant  
588 mice by pronuclear injection of circular plasmid expressing Cas9 and single guided RNA. *Sci Rep.*  
589 2013;3:3355.
- 590 3. Mashiko D, Young SA, Muto M, Kato H, Nozawa K, Ogawa M, et al. Feasibility for a large  
591 scale mouse mutagenesis by injecting CRISPR/Cas plasmid into zygotes. *Dev Growth Differ.*  
592 2014;56(1):122-9.
- 593 4. Oji A, Noda T, Fujihara Y, Miyata H, Kim YJ, Muto M, et al. CRISPR/Cas9 mediated  
594 genome editing in ES cells and its application for chimeric analysis in mice. *Sci Rep.* 2016;6:31666.
- 595 5. Oura S, Miyata H, Noda T, Shimada K, Matsumura T, Morohoshi A, et al. Chimeric  
596 analysis with newly established EGFP/DsRed2-tagged ES cells identify HYDIN as essential for  
597 spermiogenesis in mice. *Exp Anim.* 2019;68(1):25-34.
- 598 6. Ikawa M, Inoue N, Benham AM, Okabe M. Fertilization: a sperm's journey to and  
599 interaction with the oocyte. *J Clin Invest.* 2010;120(4):984-94.
- 600 7. Lu Y, Oura S, Matsumura T, Oji A, Sakurai N, Fujihara Y, et al. CRISPR/Cas9-mediated  
601 genome editing reveals 30 testis-enriched genes dispensable for male fertility in micedagger. *Biol*  
602 *Reprod.* 2019;101(2):501-11.
- 603 8. Miyata H, Castaneda JM, Fujihara Y, Yu Z, Archambeault DR, Isotani A, et al. Genome  
604 engineering uncovers 54 evolutionarily conserved and testis-enriched genes that are not required  
605 for male fertility in mice. *Proc Natl Acad Sci U S A.* 2016;113(28):7704-10.
- 606 9. Liu Z, Xiang Y, Sun G. The KCTD family of proteins: structure, function, disease relevance.  
607 *Cell Biosci.* 2013;3(1):45.

- 608 10. Teng X, Aouacheria A, Lionnard L, Metz KA, Soane L, Kamiya A, et al. KCTD: A new gene  
609 family involved in neurodevelopmental and neuropsychiatric disorders. *CNS Neurosci Ther.*  
610 2019;25(7):887-902.
- 611 11. Azizieh R, Orduz D, Van Bogaert P, Bouschet T, Rodriguez W, Schiffmann SN, et al.  
612 Progressive myoclonic epilepsy-associated gene KCTD7 is a regulator of potassium conductance in  
613 neurons. *Mol Neurobiol.* 2011;44(1):111-21.
- 614 12. Usman H, Mathew MK. Potassium channel regulator KCNRG regulates surface  
615 expression of Shaker-type potassium channels. *Biochem Biophys Res Commun.* 2010;391(3):1301-  
616 5.
- 617 13. Kim DM, Chung KS, Choi SJ, Jung YJ, Park SK, Han GH, et al. RhoB induces apoptosis  
618 via direct interaction with TNFAIP1 in HeLa cells. *Int J Cancer.* 2009;125(11):2520-7.
- 619 14. Nawa M, Kage-Nakadai E, Aiso S, Okamoto K, Mitani S, Matsuoka M. Reduced  
620 expression of BTBD10, an Akt activator, leads to motor neuron death. *Cell Death Differ.*  
621 2012;19(8):1398-407.
- 622 15. De Smaele E, Di Marcotullio L, Moretti M, Pelloni M, Occhione MA, Infante P, et al.  
623 Identification and characterization of KCASH2 and KCASH3, 2 novel Cullin3 adaptors  
624 suppressing histone deacetylase and Hedgehog activity in medulloblastoma. *Neoplasia.*  
625 2011;13(4):374-85.
- 626 16. Smaldone G, Pirone L, Balasco N, Di Gaetano S, Pedone EM, Vitagliano L. Cullin 3  
627 Recognition Is Not a Universal Property among KCTD Proteins. *PLoS One.* 2015;10(5):e0126808.
- 628 17. Canettieri G, Di Marcotullio L, Greco A, Coni S, Antonucci L, Infante P, et al. Histone  
629 deacetylase and Cullin3-REN(KCTD11) ubiquitin ligase interplay regulates Hedgehog signalling  
630 through Gli acetylation. *Nat Cell Biol.* 2010;12(2):132-42.
- 631 18. Choi E, Han C, Park I, Lee B, Jin S, Choi H, et al. A novel germ cell-specific protein,

- 632 SHIP1, forms a complex with chromatin remodeling activity during spermatogenesis. *J Biol Chem.*  
633 2008;283(50):35283-94.
- 634 19. Kluin PM, Kramer MF, de Rooij DG. Spermatogenesis in the immature mouse proceeds  
635 faster than in the adult. *Int J Androl.* 1982;5(3):282-94.
- 636 20. Letunic I, Khedkar S, Bork P. SMART: recent updates, new developments and status in  
637 2020. *Nucleic Acids Res.* 2021;49(D1):D458-D60.
- 638 21. Larkin MA, Blackshields G, Brown NP, Chenna R, McGettigan PA, McWilliam H, et al.  
639 Clustal W and Clustal X version 2.0. *Bioinformatics.* 2007;23(21):2947-8.
- 640 22. Endo T, Romer KA, Anderson EL, Baltus AE, de Rooij DG, Page DC. Periodic retinoic  
641 acid-STRA8 signaling intersects with periodic germ-cell competencies to regulate spermatogenesis.  
642 *Proc Natl Acad Sci U S A.* 2015;112(18):E2347-56.
- 643 23. Oakberg EF. A description of spermiogenesis in the mouse and its use in analysis of the  
644 cycle of the seminiferous epithelium and germ cell renewal. *Am J Anat.* 1956;99(3):391-413.
- 645 24. Hughes SE, Hawley RS. Alternative Synaptonemal Complex Structures: Too Much of a  
646 Good Thing? *Trends Genet.* 2020;36(11):833-44.
- 647 25. Watanabe D, Okabe M, Hamajima N, Morita T, Nishina Y, Nishimune Y. Characterization  
648 of the testis-specific gene 'calmegin' promoter sequence and its activity defined by transgenic  
649 mouse experiments. *FEBS Lett.* 1995;368(3):509-12.
- 650 26. Kreuzsch A, Pfaffinger PJ, Stevens CF, Choe S. Crystal structure of the tetramerization  
651 domain of the Shaker potassium channel. *Nature.* 1998;392(6679):945-8.
- 652 27. Lagger G, O'Carroll D, Rembold M, Khier H, Tischler J, Weitzer G, et al. Essential  
653 function of histone deacetylase 1 in proliferation control and CDK inhibitor repression. *Embo j.*  
654 2002;21(11):2672-81.
- 655 28. Fujihara Y, Kaseda K, Inoue N, Ikawa M, Okabe M. Production of mouse pups from

- 656 germline transmission-failed knockout chimeras. *Transgenic Res.* 2013;22(1):195-200.
- 657 29. Isotani A, Nakanishi T, Kobayashi S, Lee J, Chuma S, Nakatsuji N, et al. Genomic  
658 imprinting of XX spermatogonia and XX oocytes recovered from XX $\leftrightarrow$ XY chimeric testes. *Proc*  
659 *Natl Acad Sci U S A.* 2005;102(11):4039-44.
- 660 30. Fang K, Li Q, Wei Y, Zhou C, Guo W, Shen J, et al. Prediction and validation of mouse  
661 meiosis-essential genes based on spermatogenesis proteome dynamics. *Mol Cell Proteomics.* 2020.
- 662 31. Eaker S, Cobb J, Pyle A, Handel MA. Meiotic prophase abnormalities and metaphase cell  
663 death in MLH1-deficient mouse spermatocytes: insights into regulation of spermatogenic progress.  
664 *Dev Biol.* 2002;249(1):85-95.
- 665 32. McKim KS, Jang JK, Theurkauf WE, Hawley RS. Mechanical basis of meiotic metaphase  
666 arrest. *Nature.* 1993;362(6418):364-6.
- 667 33. Stogios PJ, Downs GS, Jauhal JJ, Nandra SK, Prive GG. Sequence and structural  
668 analysis of BTB domain proteins. *Genome Biol.* 2005;6(10):R82.
- 669 34. Huynh KD, Bardwell VJ. The BCL-6 POZ domain and other POZ domains interact with  
670 the co-repressors N-CoR and SMRT. *Oncogene.* 1998;17(19):2473-84.
- 671 35. Li JY, English MA, Ball HJ, Yeyati PL, Waxman S, Licht JD. Sequence-specific DNA  
672 binding and transcriptional regulation by the promyelocytic leukemia zinc finger protein. *J Biol*  
673 *Chem.* 1997;272(36):22447-55.
- 674 36. Melnick A, Carlile G, Ahmad KF, Kiang CL, Corcoran C, Bardwell V, et al. Critical  
675 residues within the BTB domain of PLZF and Bcl-6 modulate interaction with corepressors. *Mol*  
676 *Cell Biol.* 2002;22(6):1804-18.
- 677 37. Ding Z, Gillespie LL, Paterno GD. Human MI-ER1 alpha and beta function as  
678 transcriptional repressors by recruitment of histone deacetylase 1 to their conserved ELM2 domain.  
679 *Mol Cell Biol.* 2003;23(1):250-8.



- 680 38. Itoh T, Fairall L, Muskett FW, Milano CP, Watson PJ, Arnaudo N, et al. Structural and  
681 functional characterization of a cell cycle associated HDAC1/2 complex reveals the structural basis  
682 for complex assembly and nucleosome targeting. *Nucleic Acids Res.* 2015;43(4):2033-44.
- 683 39. Millard CJ, Watson PJ, Celardo I, Gordiyenko Y, Cowley SM, Robinson CV, et al. Class I  
684 HDACs share a common mechanism of regulation by inositol phosphates. *Mol Cell.* 2013;51(1):57-  
685 67.
- 686 40. Dai X, Zhang M, Lu Y, Miao Y, Zhou C, Xiong B. Cullin9 protects mouse eggs from  
687 aneuploidy by controlling microtubule dynamics via Survivin. *Biochim Biophys Acta.*  
688 2016;1863(12):2934-41.
- 689 41. Turnbull RE, Fairall L, Saleh A, Kelsall E, Morris KL, Ragan TJ, et al. The MiDAC  
690 histone deacetylase complex is essential for embryonic development and has a unique multivalent  
691 structure. *Nat Commun.* 2020;11(1):3252.
- 692 42. Noda T, Sakurai N, Nozawa K, Kobayashi S, Devlin DJ, Matzuk MM, et al. Nine genes  
693 abundantly expressed in the epididymis are not essential for male fecundity in mice. *Andrology.*  
694 2019;7(5):644-53.
- 695 43. Oura S, Kazi S, Savolainen A, Nozawa K, Castaneda J, Yu Z, et al. Cfap97d1 is important  
696 for flagellar axoneme maintenance and male mouse fertility. *PLoS Genet.* 2020;16(8):e1008954.
- 697 44. Kishiro Y, Kagawa M, Naito I, Sado Y. A novel method of preparing rat-monoclonal  
698 antibody-producing hybridomas by using rat medial iliac lymph node cells. *Cell Struct Funct.*  
699 1995;20(2):151-6.
- 700 45. Sado Y, Inoue S, Tomono Y, Omori H. Lymphocytes from enlarged iliac lymph nodes as  
701 fusion partners for the production of monoclonal antibodies after a single tail base immunization  
702 attempt. *Acta Histochem Cytochem.* 2006;39(3):89-94.
- 703 46. Oji A, Isotani A, Fujihara Y, Castaneda JM, Oura S, Ikawa M. Tesmin, Metallothionein-

- 704 Like 5, is Required for Spermatogenesis in Micedagger. Biol Reprod. 2020;102(4):975-83.
- 705 47. Wellard SR, Hopkins J, Jordan PW. A Seminiferous Tubule Squash Technique for the
- 706 Cytological Analysis of Spermatogenesis Using the Mouse Model. J Vis Exp. 2018(132).
- 707
- 708

## 709 **Figure legends**

### 710 **Fig 1. Production of *Kctd19*<sup>del/del</sup> mice and fertility analysis.**

711 (A) RT-PCR using multi-tissue cDNA. *Actb* was used as a loading control. (B) RT-PCR using  
712 postnatal testis cDNA. *Actb* was used as a loading control. (C) Schematic of KCTD19 protein  
713 structure and antigen position. (D) Phylogenetic tree constructed by ClustalW with KCTD19  
714 sequences of various mammals. (E) Gene map of *Kctd19*. Black and white boxes indicate  
715 coding and non-coding regions, respectively. Black arrows and arrowheads indicate primers  
716 for genotyping and gRNAs for genome editing, respectively. (F) An example of genotyping  
717 PCR with two primer sets shown in E. (G) DNA sequencing for deletion verification. (H)  
718 Immunoblotting with antibodies against mouse KCTD19. Red arrows indicate the expected  
719 molecular size of KCTD19. GAPDH was used as a loading control. (I) The result of mating  
720 tests. Pups/plug: 8.8±2.4 [WT]; 0 [*del/del*] (J) Pup numbers obtained from mating pairs of  
721 *Kctd19*<sup>del/del</sup> females and *Kctd19*<sup>wt/del</sup> males (7.8±2.2).

722

### 723 **Fig 2. Histological analysis of *Kctd19*<sup>del/del</sup> mice.**

724 (A) Testis morphology and (B) testis/body weight of *Kctd19*<sup>wt/del</sup> and *Kctd19*<sup>del/del</sup> adult mice at  
725 12 weeks. Testis/body weight: 4.5±0.2 x 10<sup>-3</sup> [*wt/del*], 1.2±0.3 x 10<sup>-3</sup> [*del/del*]. Error bars  
726 indicate one standard deviation. (C) PAS staining of seminiferous tubules of adult mice. The  
727 seminiferous epithelium cycle was determined by germ cell position and nuclear morphology.  
728 (D) TUNEL staining of seminiferous tubules of adult mice counterstained with hematoxylin. (E)  
729 PAS staining of cauda epididymis of adult mice. (F & G) Immunostaining of seminiferous  
730 tubules of adult mice. The seminiferous epithelium cycle was determined by cell position,  
731 nuclear morphology, and morphology of acrosome staining with AlexaFlour 568-conjugated  
732 lectin PNA.

733

734 **Fig 3. Cytological analysis of *Kctd19*<sup>del/del</sup> spermatocytes.**

735 (A & B) Immunostaining of spread nuclei from prophase spermatocytes collected from adult  
736 (A) and juvenile (B) mice. (C) The percentage of each meiotic prophase stage present is  
737 determined by immunostained spread nuclei samples. (D) Giemsa staining of spread nuclei  
738 of metaphase I spermatocytes. (E) Immunostaining of prophase spermatocytes with  
739 antibodies against CENPC and  $\alpha$ -TUBULIN. Right panels (1 – 4) show additional *Kctd19*<sup>del/del</sup>  
740 spermatocytes. Red arrows indicate misaligned chromosomes. (F) The percentage of  
741 metaphase I spermatocytes with misaligned chromosomes. (G) Immunostaining of prophase  
742 spermatocytes with antibodies against SYCP3 and  $\alpha$  TUBULIN. Right panels (1 – 4) show  
743 additional *Kctd19*<sup>del/del</sup> spermatocytes. Red and yellow arrows indicate misaligned  
744 chromosomes and SYCP3 polycomplexes, respectively. (H) The percentage of metaphase I  
745 spermatocytes with SYCP3 polycomplexes.

746

747 **Fig 4. Transgenic (Tg) rescue of *Kctd19*<sup>del/del</sup> mice.**

748 (A) Schematic of Tg mouse production. Red and yellow boxes indicate affinity tags and *Kctd19*  
749 ORF, respectively. Black arrows indicate primers for genotyping. (B) An example of PRC  
750 genotyping with two primer sets shown in A. (C & D) Immunoblotting with antibodies against  
751 FLAG (C) and HA (D) for determining expression levels. (E & F) Immunoprecipitation with  
752 antibodies against FLAG (E) and HA (F) and immunoblotting with antibodies against HA and  
753 FLAG, respectively. (G) Schematics of fertility determination of Tg mice. (H & I) Two-cell  
754 embryos obtained from WT females mated with *Kctd19*<sup>del/del</sup> males with transgenes. (J) Testis  
755 morphology and (K) testis/body weight of WT and *Kctd19*<sup>del/del</sup>, Tg #1 adult mice at 8 weeks.  
756 Testis/body weight:  $3.2 \pm 0.1$  [WT];  $4.7 \pm 1.6$  [*Kctd19*<sup>del/del</sup>, Tg #1]. Error bars indicate one

757 standard deviation. (L) PAS staining of seminiferous tubules of adult mice. The seminiferous  
758 epithelium cycle was determined by germ cell position and nuclear morphology. (M)  
759 Immunostaining of seminiferous tubules of adult mice. The seminiferous epithelium cycle was  
760 determined by cell position, nuclear morphology, and morphology of the acrosome stained  
761 with AlexaFlour 568-conjugated lectin PNA.

762

### 763 **Fig 5. IP-MS analysis with anti-KCTD19 antibody**

764 (A & B) Silver staining of IP eluting samples with rabbit pAb (A) and rat mAb #1 (B). Two  
765 juvenile WT mice and two adult *Kctd19<sup>del/del</sup>* mice were used for each experiment. (C) The list  
766 of identified proteins by MS analysis. The quantitative value was calculated using Scaffold  
767 software (D) Immunoprecipitation with an anti-HDAC1 antibody and immunoblotting with an  
768 anti-HDAC1 antibody. For input sample, 50 µg of testis lysate was used. (E) Immunoblotting  
769 with an anti-HDAC1 antibody. GAPDH was used as a loading control. (F) Immunostaining with  
770 an anti-HDAC1 antibody. The seminiferous epithelium cycle was determined by cell position,  
771 nuclear morphology, and morphology of the acrosome stained with AlexaFlour 568-conjugated  
772 lectin PNA.

773

### 774 **Fig 6. Chimeric analysis of *Zfp541* KO spermatocytes**

775 (A) RT-PCR using multi-tissue cDNA. *Actb* was used as a loading control. (B) RT-PCR using  
776 postnatal testis cDNA. *Actb* was used as a loading control. (C) Gene map of *Zfp541*. Black  
777 and white boxes indicate coding and non-coding regions, respectively. Black arrows and  
778 arrowheads indicate primers for genotyping and gRNAs for genome editing, respectively. (D)  
779 Genotyping PCR with two primer sets in C for ES cell clones used in this study. (E) Schematics  
780 of chimeric mice production. ESC-derived cells were labeled with GFP fluorescence. (F) PAS

781 staining of seminiferous tubules of chimeric mice. ES cell-derived *Zfp541*-KO spermatocytes  
782 were identified by immunohistochemistry against GFP. (G) TUNEL staining of seminiferous  
783 tubules of chimeric mice counterstained with hematoxylin. ES cell-derived *Zfp541*-KO  
784 spermatocytes were identified by immunohistochemistry against GFP. (H & I) Immunostaining  
785 of seminiferous tubules of chimeric mice with antibodies against KCTD19 (H) and HDAC1 (I).  
786 ES cell-derived *Zfp541*-KO spermatocytes were identified by GFP immunostaining. (J)  
787 Immunostaining of spread nuclei of prophase spermatocytes collected from XY->XX chimeric  
788 mice. Red and yellow boxes were magnified in the right panels. (K) The percentage of cells in  
789 various meiotic prophase stages counted with immunostained spread nuclei samples.  
790  
791

## 792 **Supporting information**

### 793 **Fig S1. Sequence comparison of KCTD19 in various mammals.**

794 Protein sequence comparison of KCTD19 in cattle (NP\_001098862.1), pig  
795 (XP\_003126977.2), dog (XP\_022275030.1), fox (XP\_025867456.1), cat (XP\_023101865.1),  
796 bat (XP\_027998908.1), human (NP\_001094385.1), chimpanzee (XP\_523391.2), rhesus  
797 monkey (XP\_014981866.1), mouse (NP\_808459.1), rat (NP\_001292128.1), and golden  
798 hamster (XP\_021086458.1).

799

### 800 **Fig S2. Production of *Kctd19*- $\Delta$ POZ mice and fertility analysis.**

801 (A) Gene map of *Kctd19*. Black and white boxes indicate coding and non-coding regions,  
802 respectively. Black arrows and arrowheads indicate primers for genotyping and gRNAs for  
803 genome editing, respectively. (B) An example of genotyping PCR with two primer sets shown  
804 in S2A. (C) DNA sequencing verify the deletion. (D) RT-PCR using tetis cDNA obtained from  
805 WT and  $\Delta$ POZ/ $\Delta$ POZ mice. *Actb* was used as a loading control. (E) Immunoblotting using tetis  
806 lysates obtained from WT, *del/del*, and  $\Delta$ POZ/ $\Delta$ POZ mice. (F) PAS staining of seminiferous  
807 tubules of adult mice. The seminiferous epithelium cycle was determined by germ cell position  
808 and nuclear morphology.

809

### 810 **Fig S3. Sequence comparison of ZFP541 in various mammals.**

811 Protein sequence comparison of ZFP541 or ZNF541 proteins from various mammals: cattle  
812 (XP\_015313711.2), pig (XP\_020950303.1), dog (XP\_005616437.1), fox (XP\_025869832.1),  
813 cat (XP\_023100994.1), bat (XP\_008152641.1), human (NP\_001264004.1), chimpanzee  
814 (XP\_016791837.1), rhesus monkey (XP\_014979842.2), mouse (NP\_001092747.1), rat  
815 (NP\_001100928.2), and golden hamster (XP\_021078928.1).

816

817 **Fig S4. Production of XY->XX chimeric mice and their feature.**

818 (A) Schematic of XY->XX chimeric mice production. XX prospermatogonia are eliminated

819 around PND2. (B) Testis section from chimeric mice. ES cell-derived cells were labeled with

820 GFP fluorescence. Astarisk indicates depleted tubules.



# Figure 1

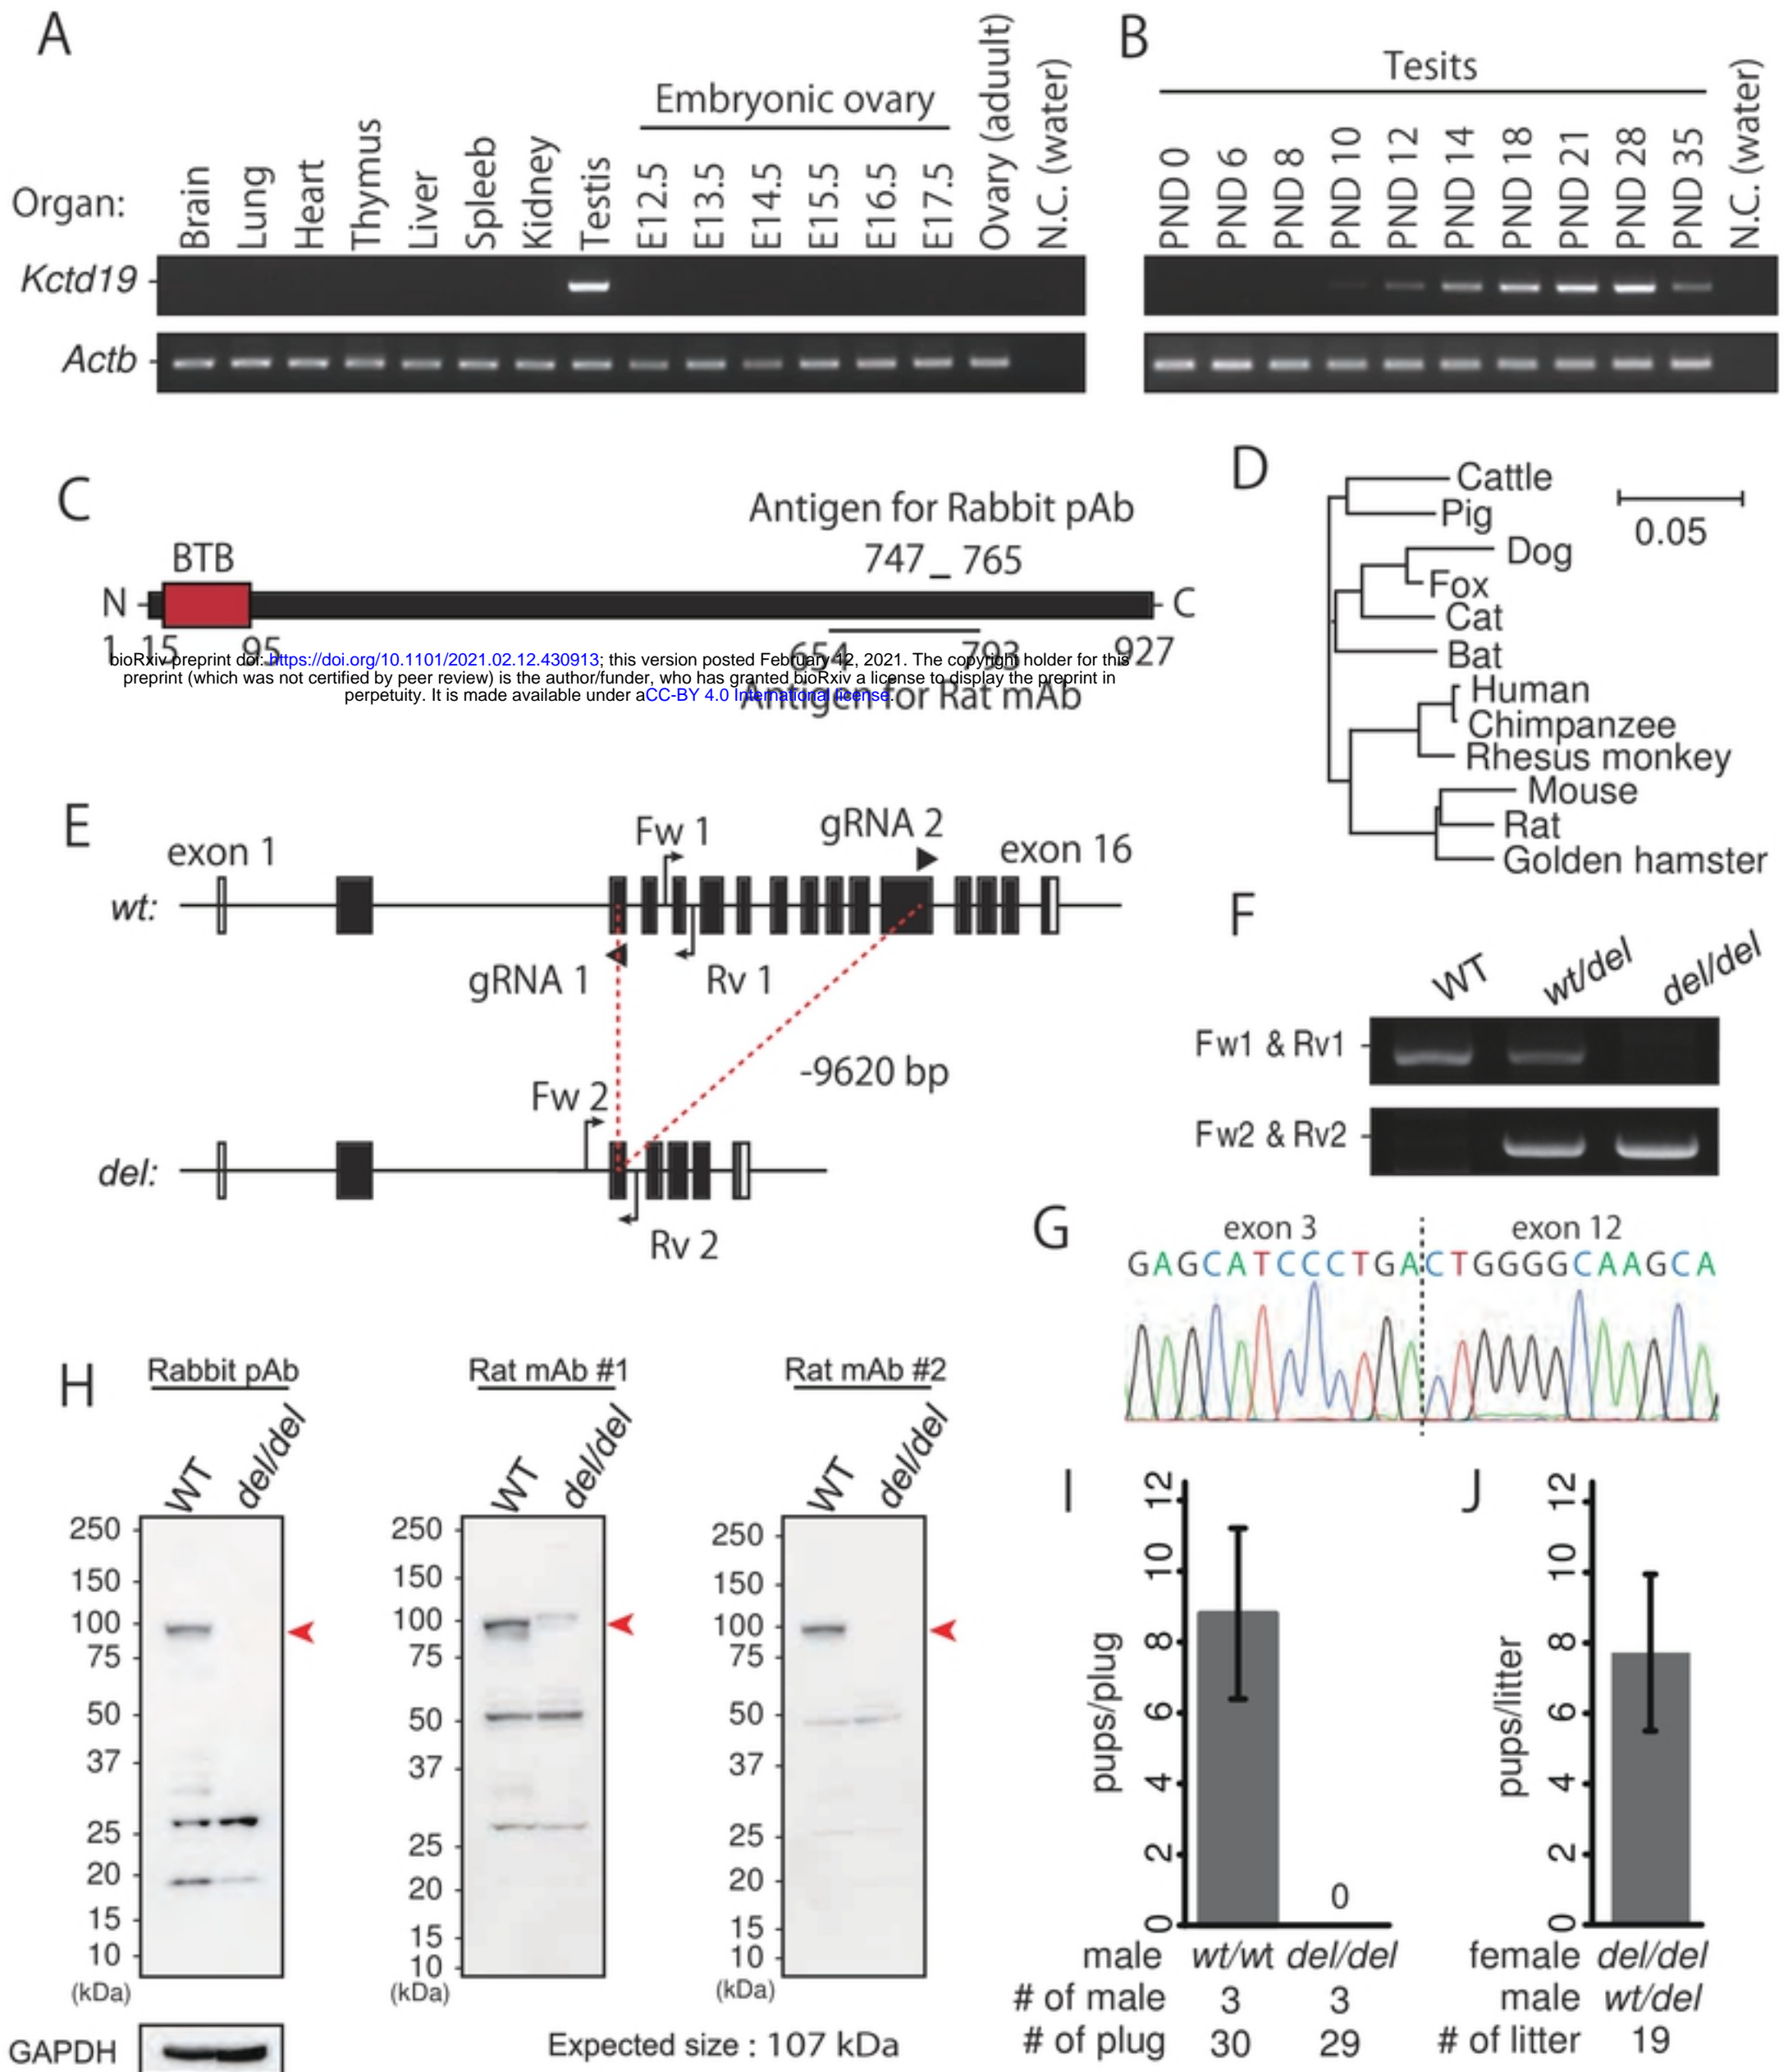

Figure 2

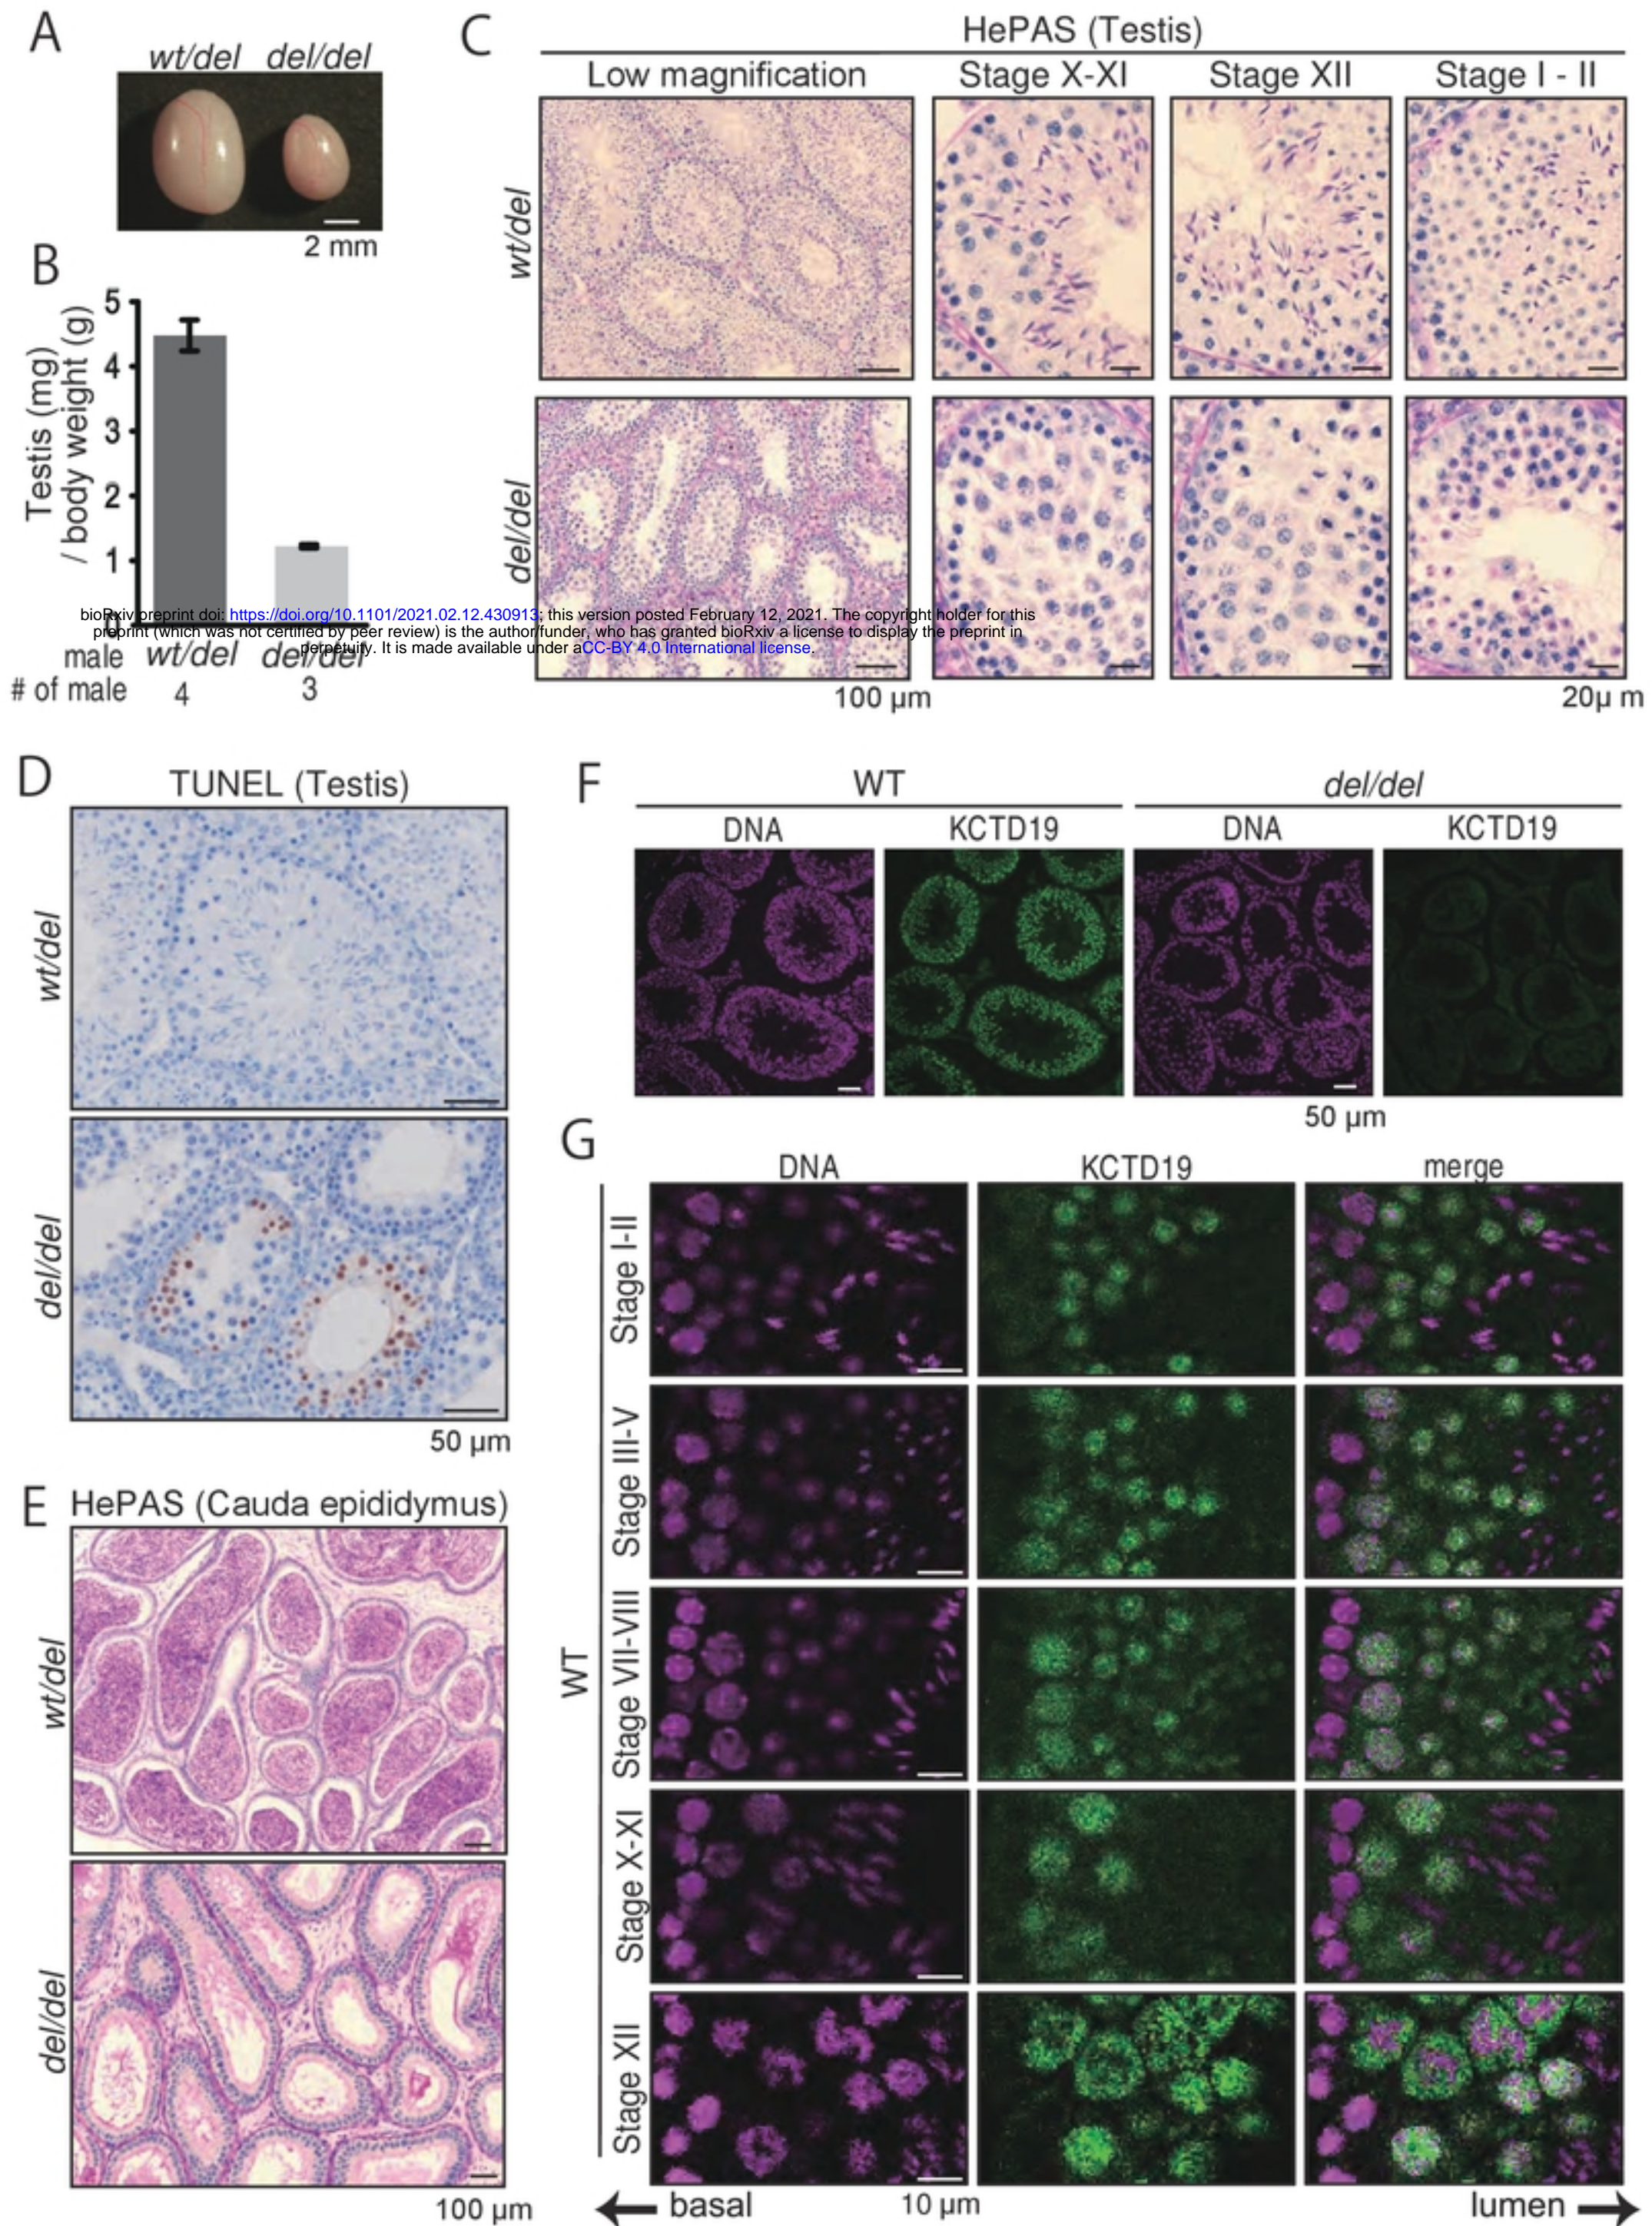

Figure 3

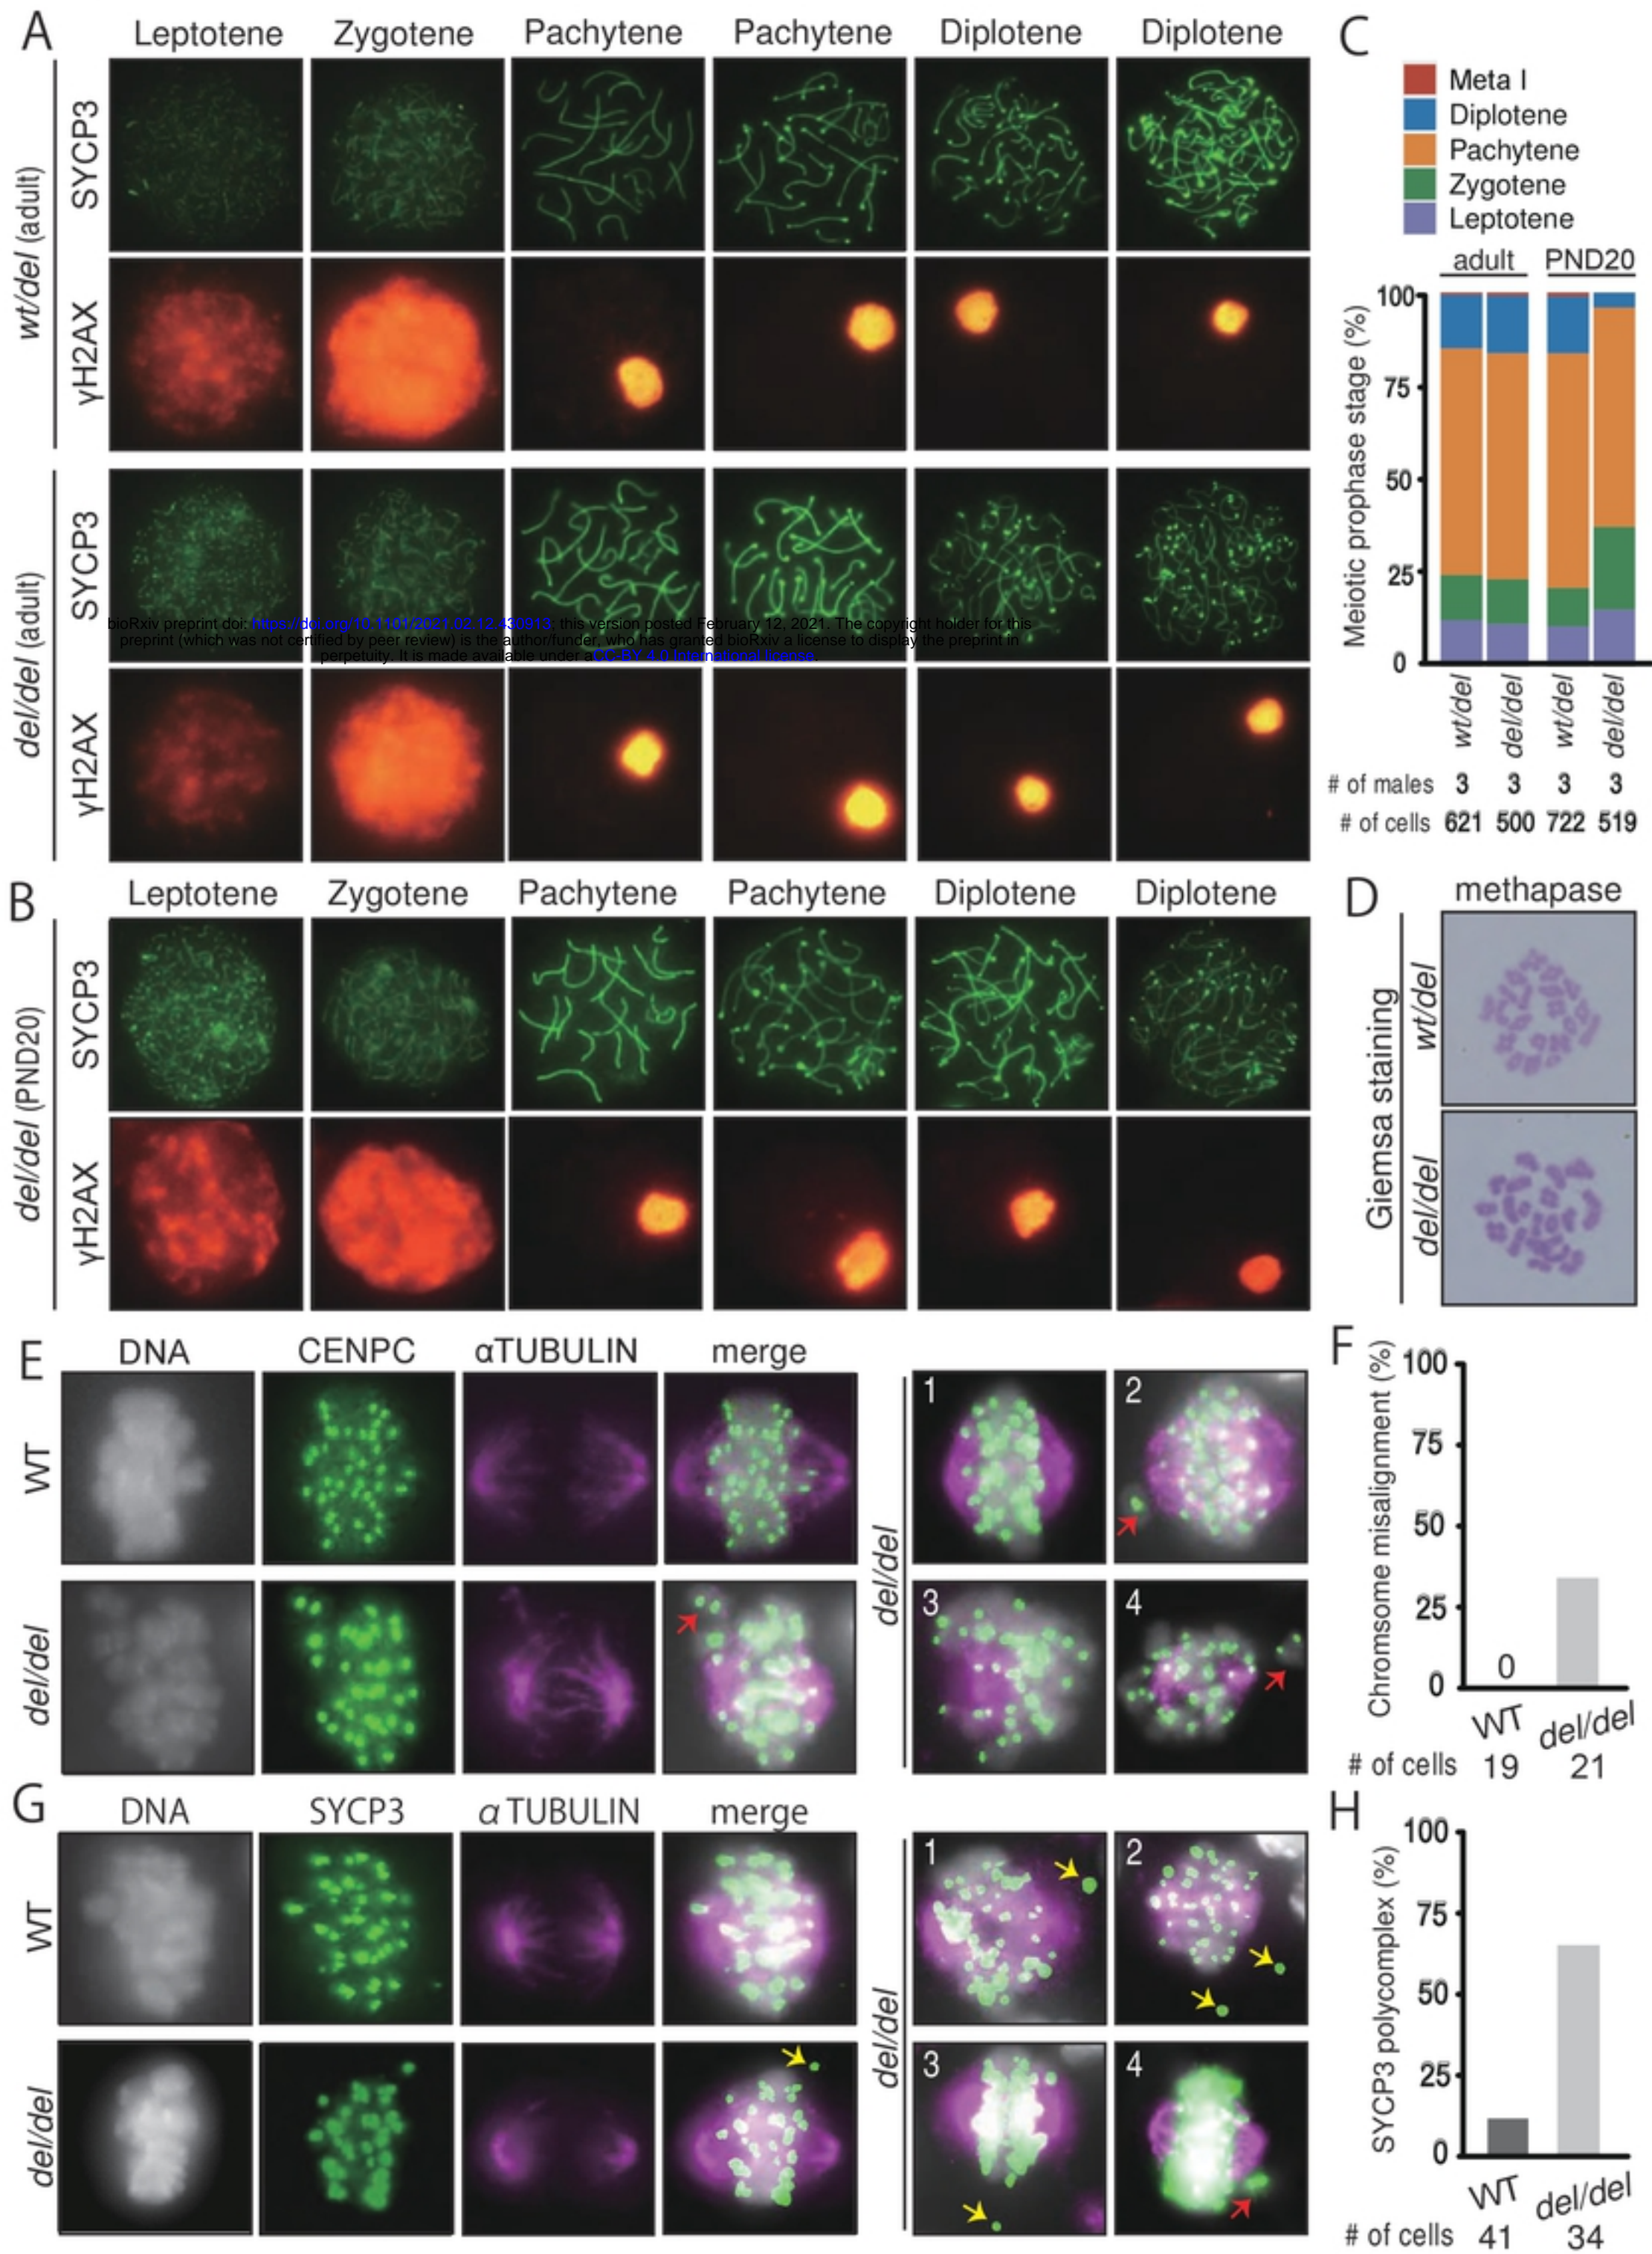

Figure 4

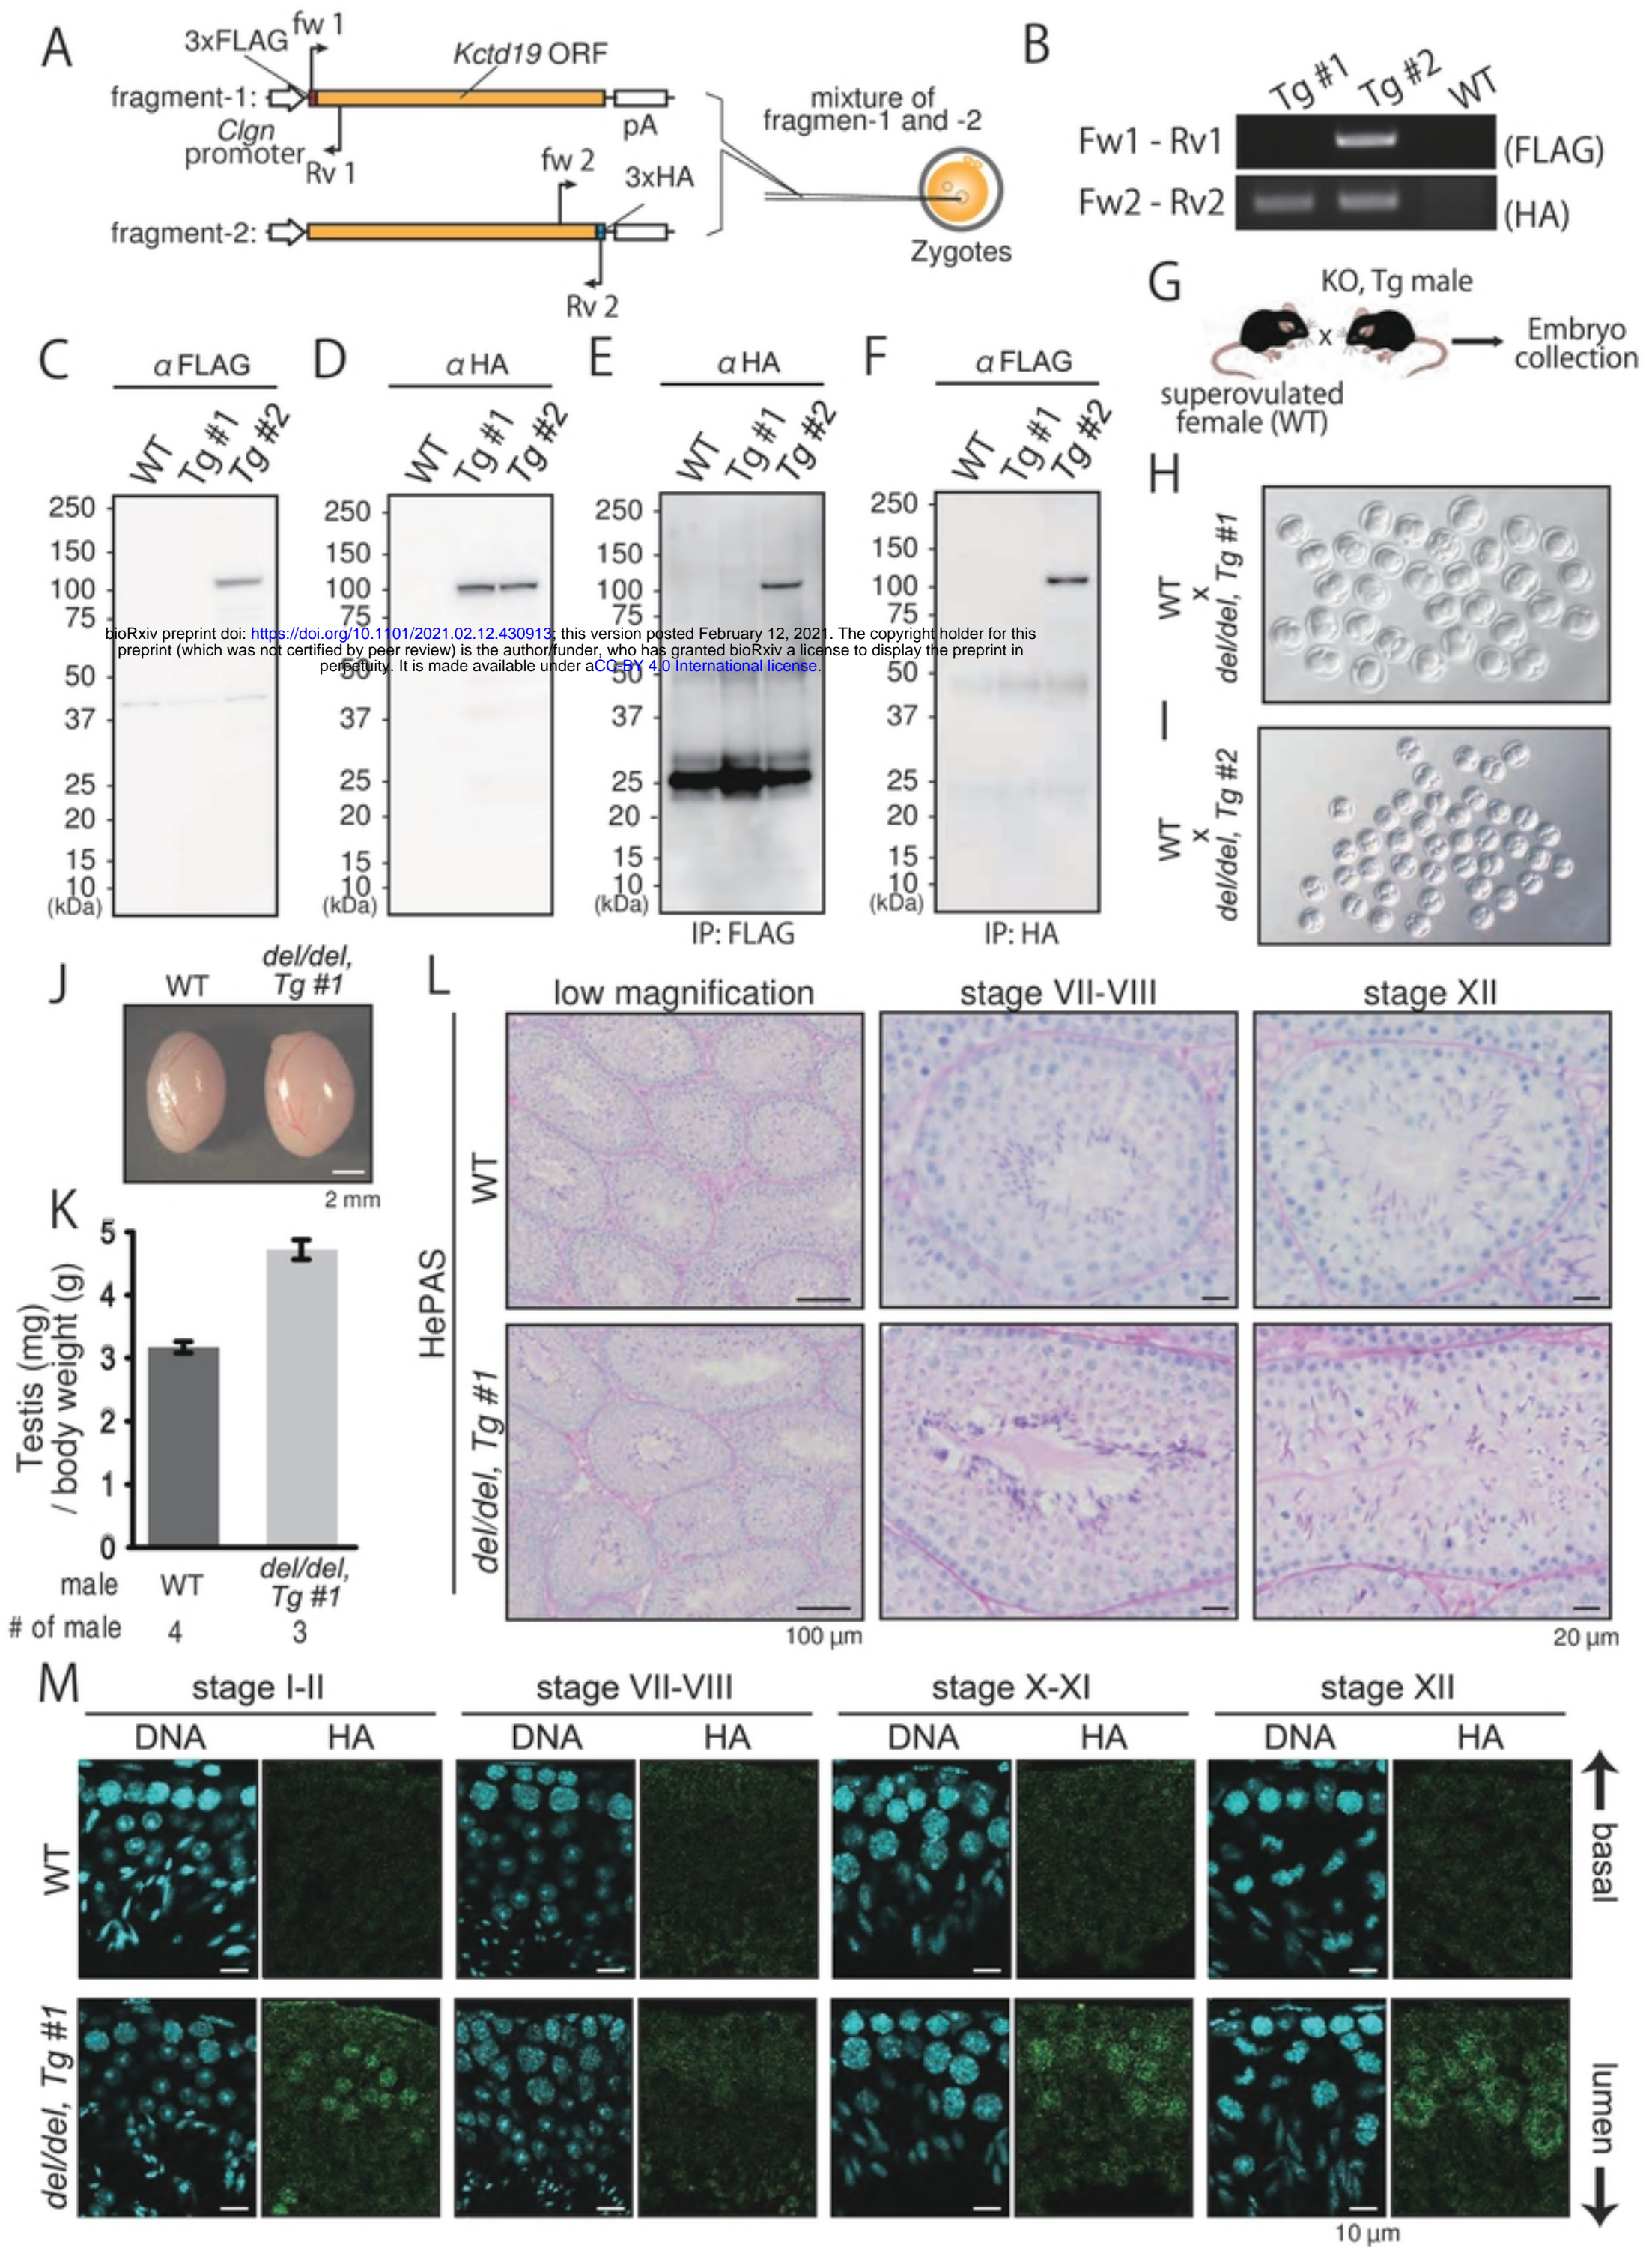

# Figure 5

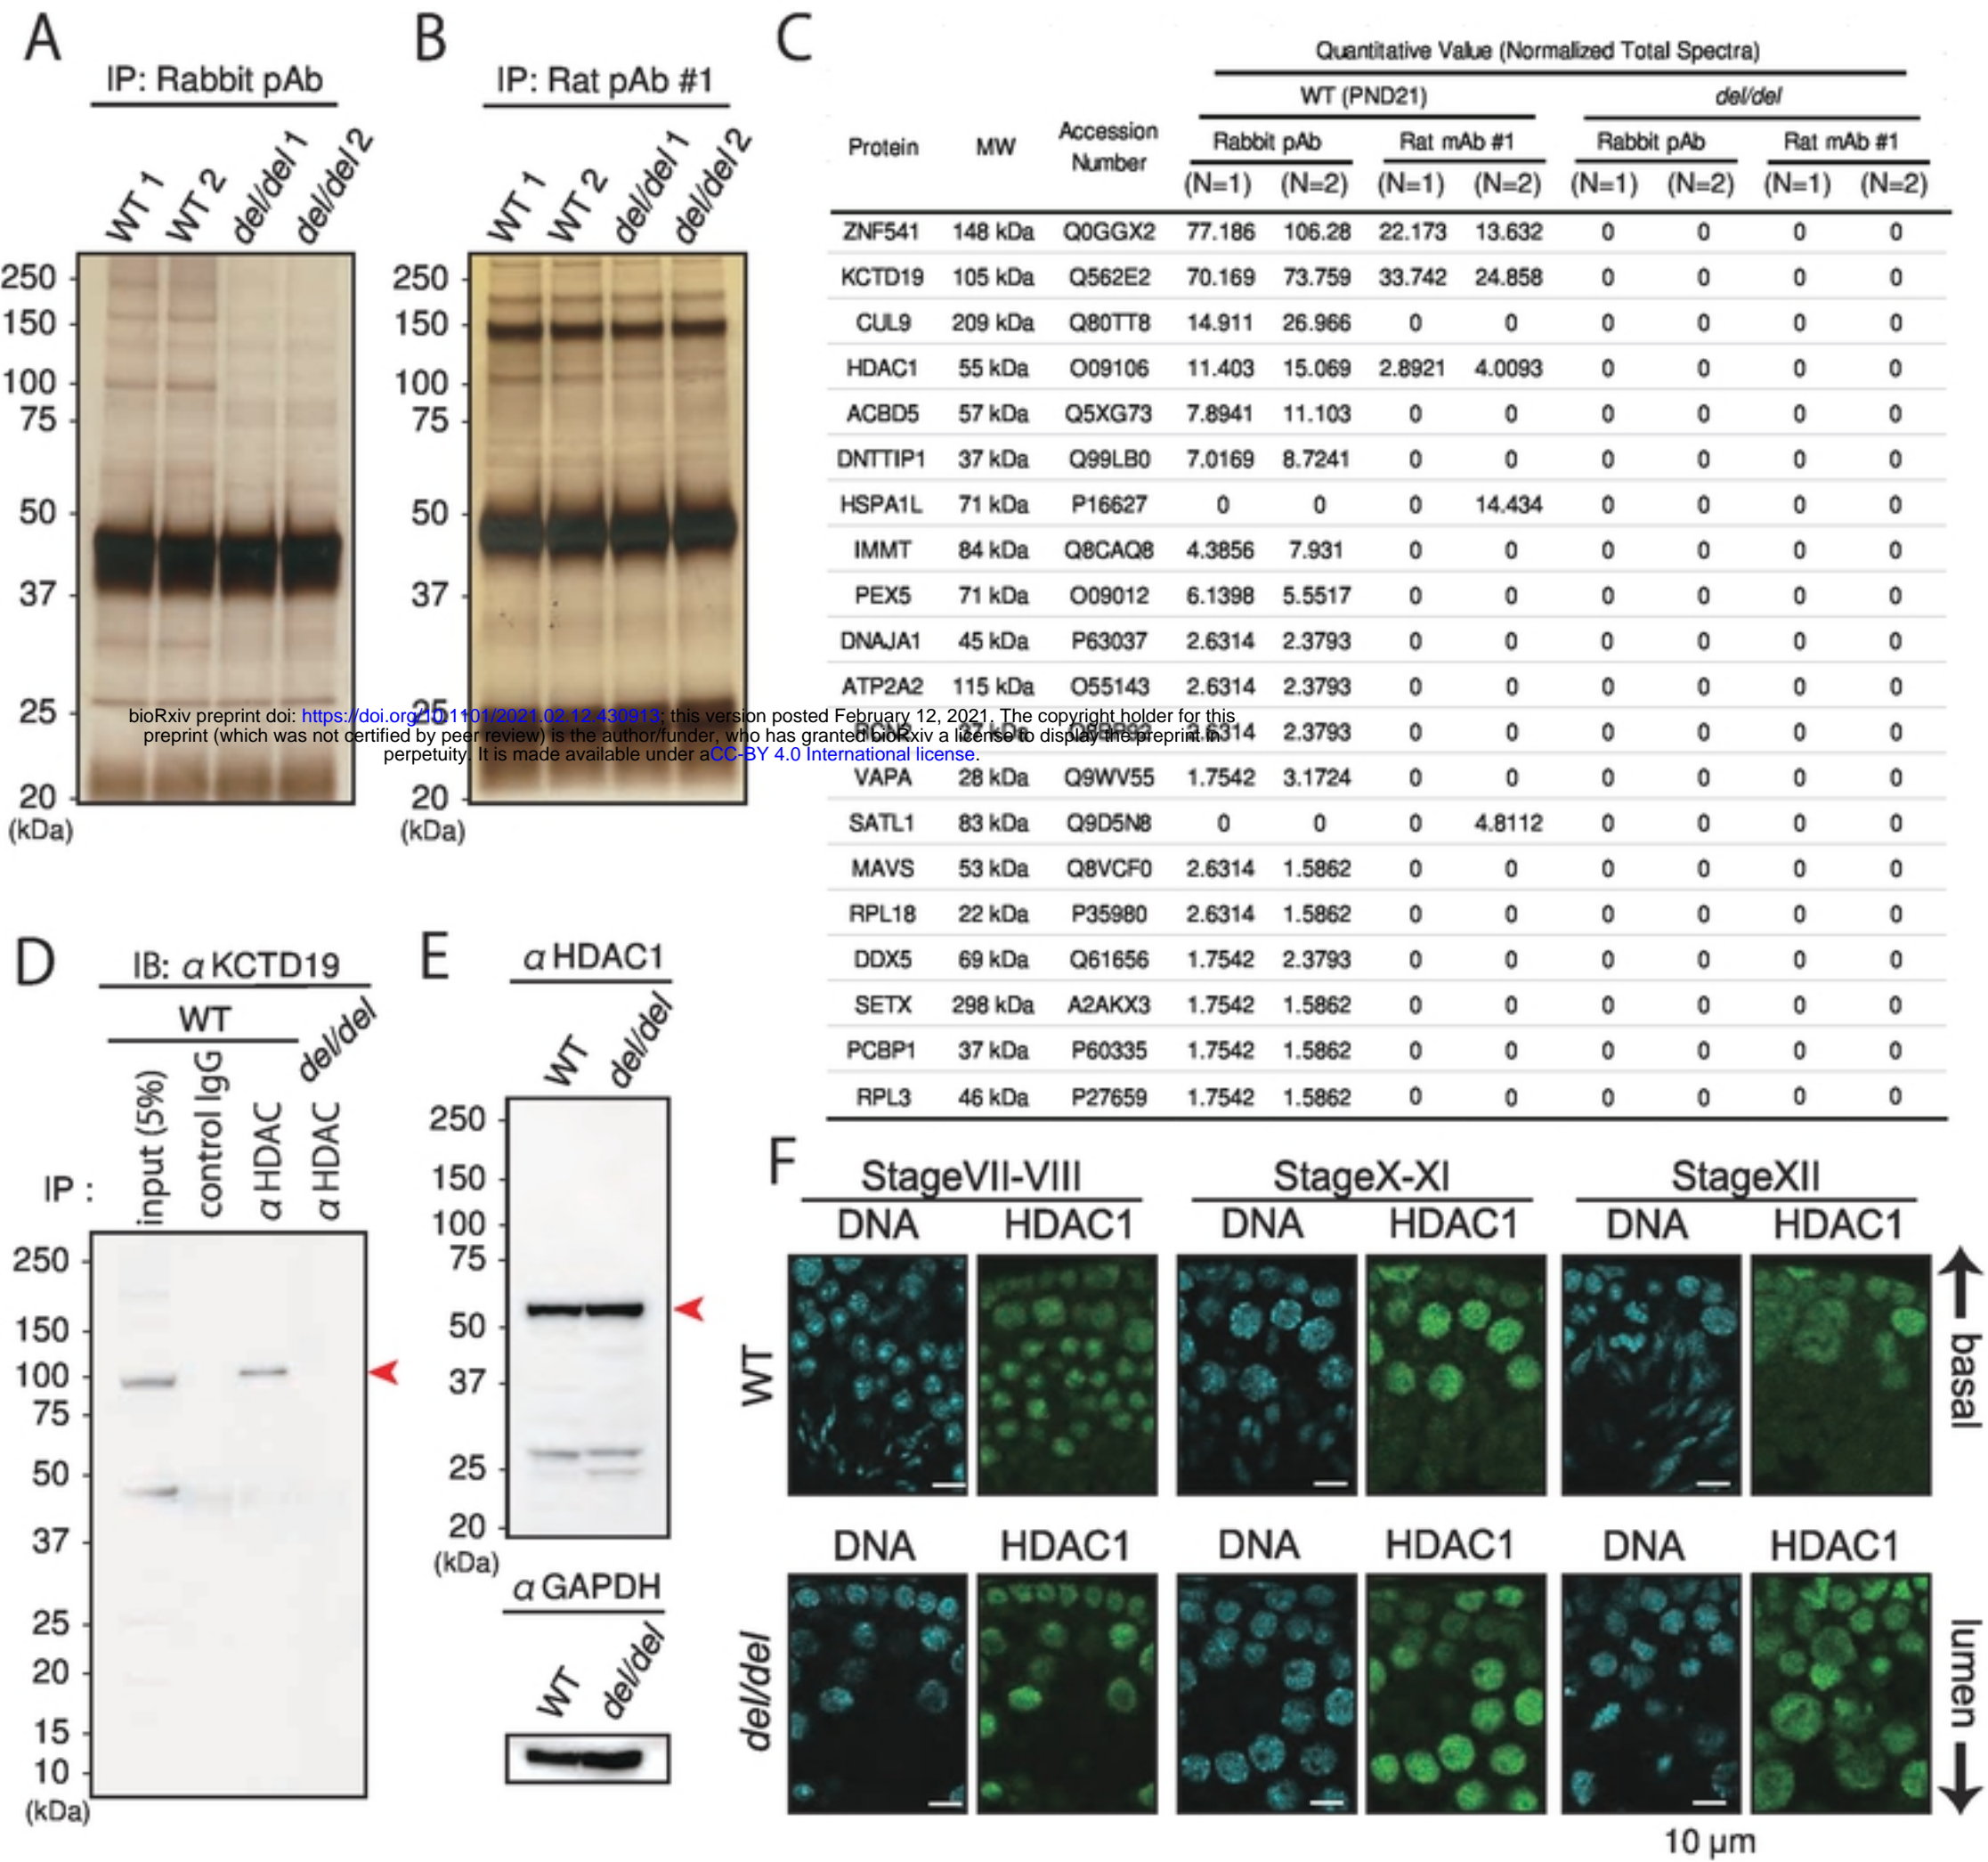

bioRxiv preprint doi: <https://doi.org/10.1101/2021.02.12.430913>; this version posted February 12, 2021. The copyright holder for this preprint (which was not certified by peer review) is the author/funder, who has granted bioRxiv a license to display the preprint in perpetuity. It is made available under aCC-BY 4.0 International license.

Figure 6

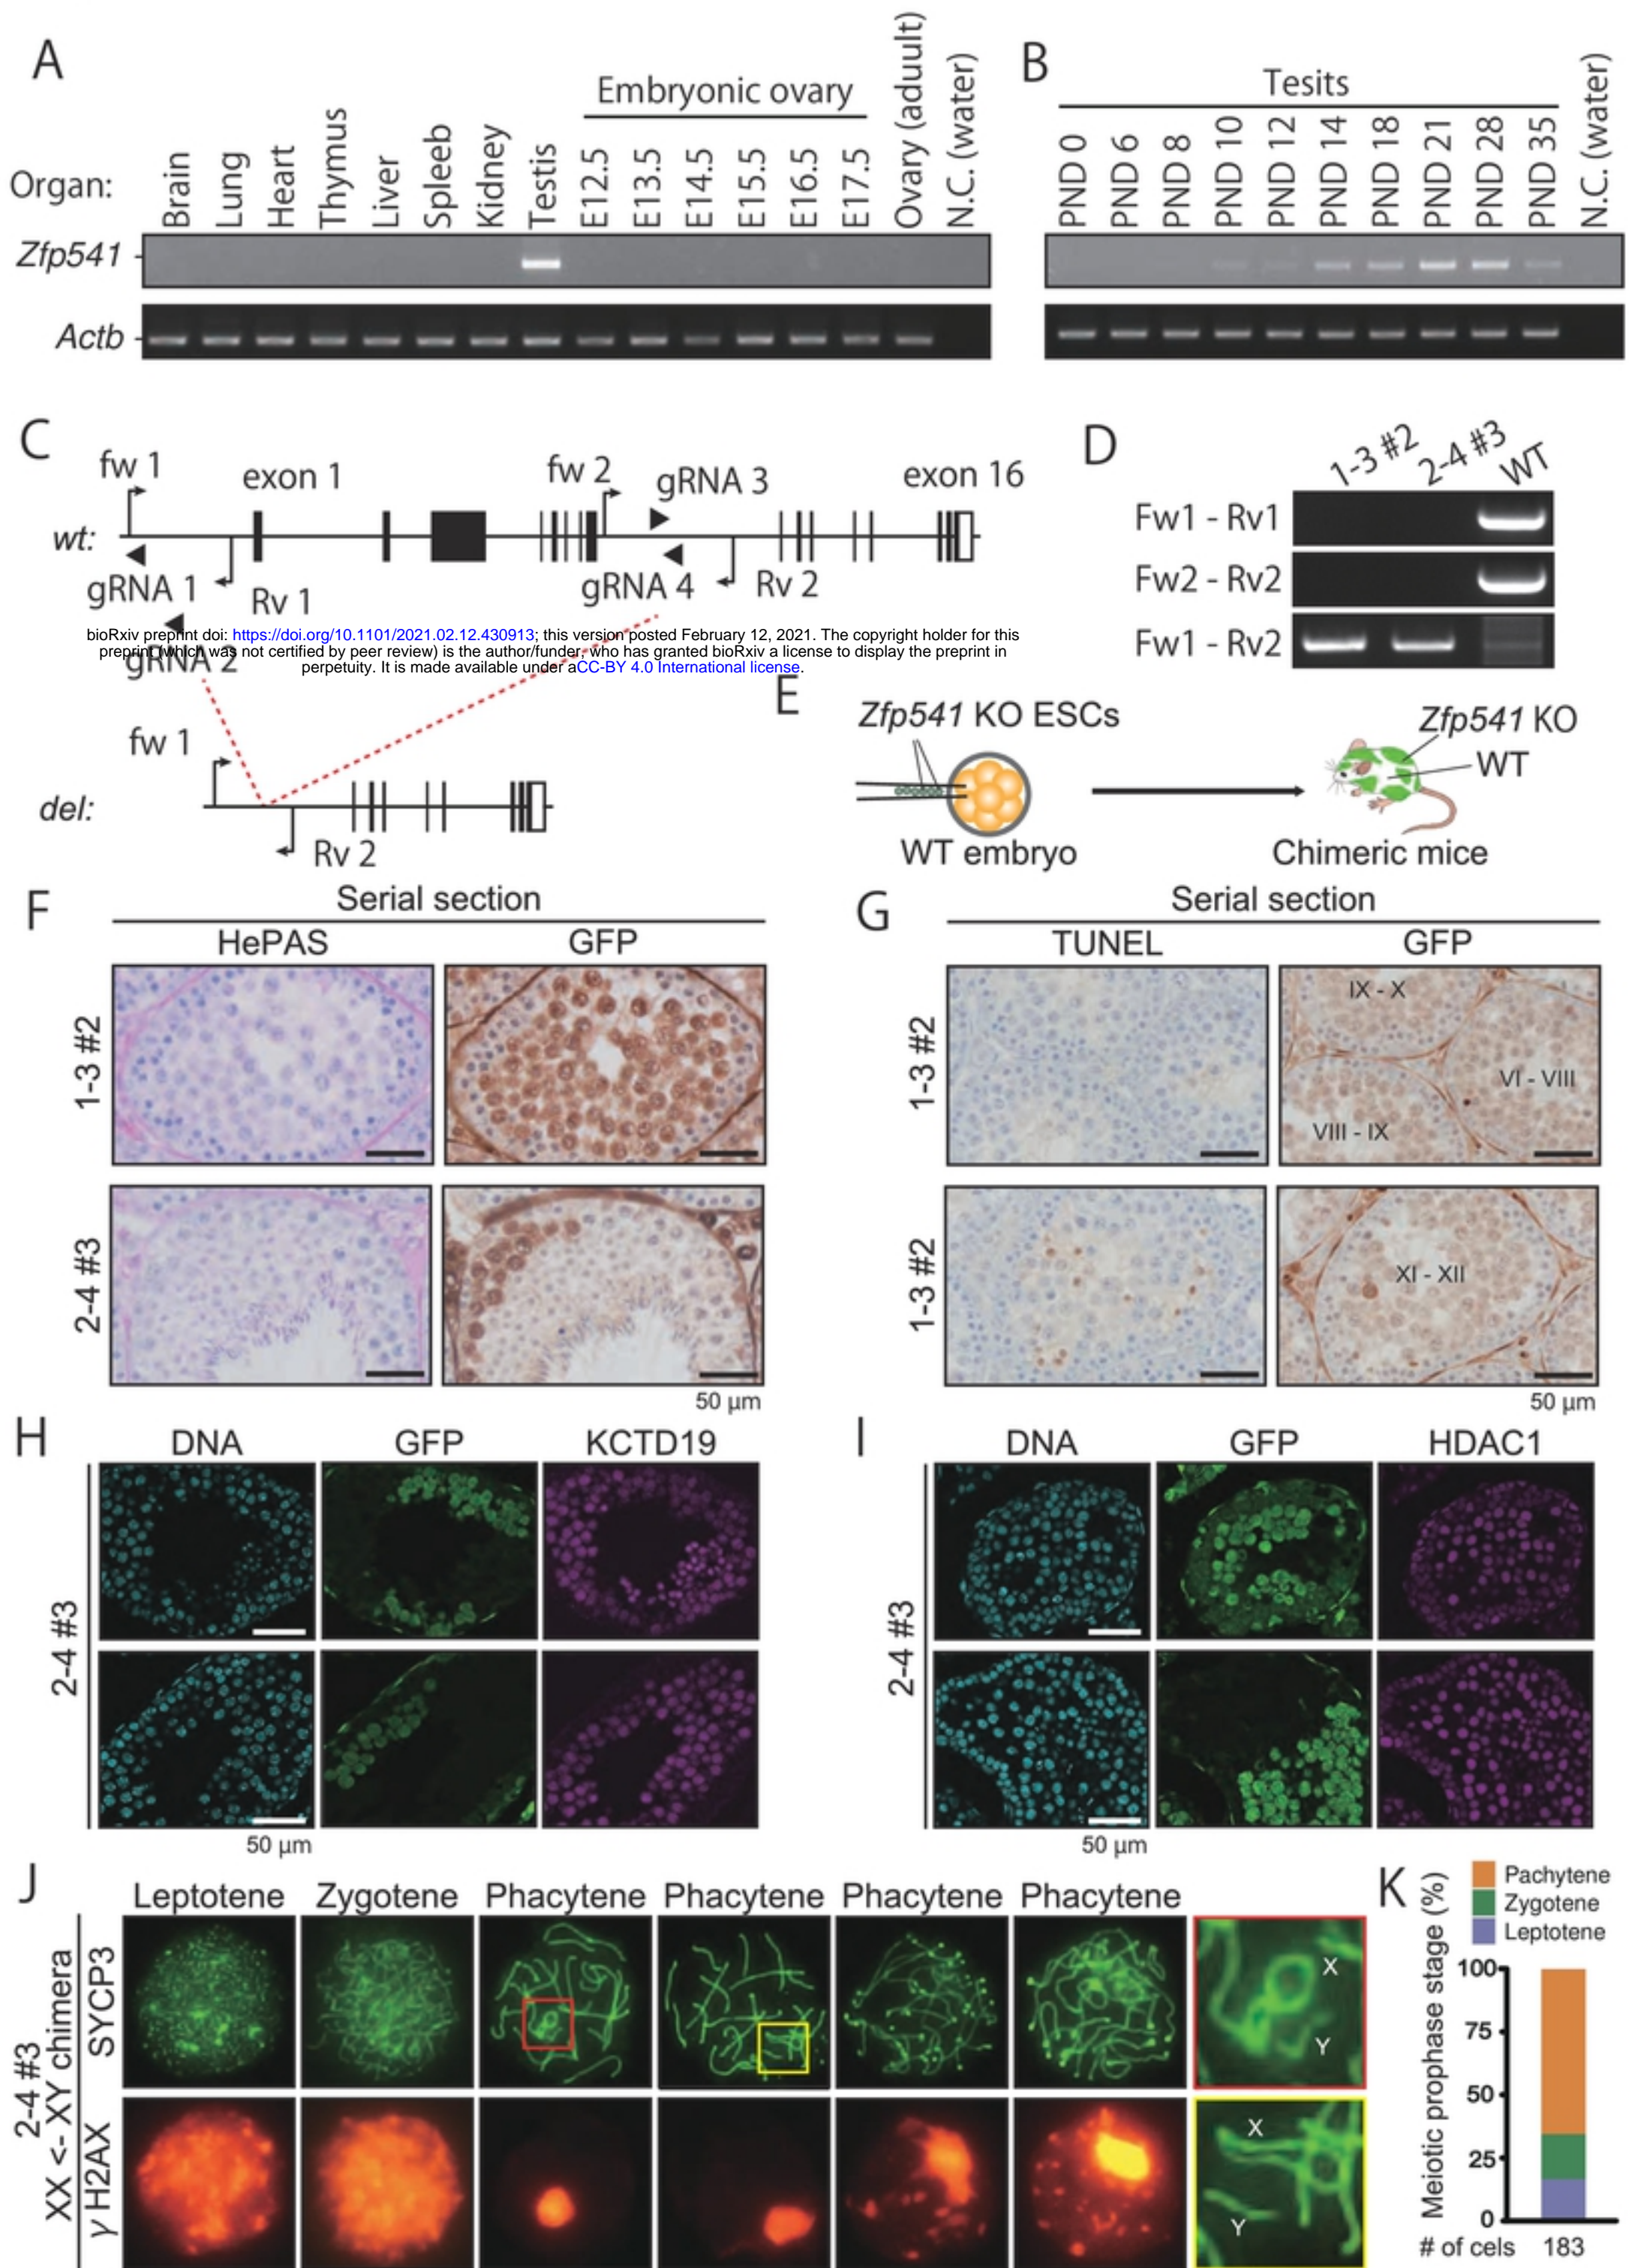

bioRxiv preprint doi: <https://doi.org/10.1101/2021.02.12.430913>; this version posted February 12, 2021. The copyright holder for this preprint (which was not certified by peer review) is the author/funder, who has granted bioRxiv a license to display the preprint in perpetuity. It is made available under aCC-BY 4.0 International license.
